1 **Individuals at risk for developing rheumatoid arthritis harbor differential intestinal**  
2 **bacteriophage communities with distinct metabolic potential**

3

4

5

6 Mihnea R. Mangalea<sup>1</sup>, David Paez-Espino<sup>2,3</sup>, Kristopher Kieft<sup>4</sup>, Anushila Chatterjee<sup>1</sup>, Jennifer A.  
7 Seifert<sup>5</sup>, Marie L. Feser<sup>5</sup>, M. Kristen Demoruelle<sup>5</sup>, Meagan E. Chriswell<sup>5</sup>, Alexandra Sakatos<sup>3</sup>,  
8 Karthik Anantharaman<sup>4</sup>, Kevin D. Deane<sup>5</sup>, Kristine A. Kuhn<sup>5</sup>, V. Michael Holers<sup>5</sup>, and Breck A.  
9 Duerkop<sup>1,6,\*</sup>

10

11 <sup>1</sup>Department of Immunology and Microbiology, University of Colorado School of Medicine,  
12 Aurora, CO, USA

13 <sup>2</sup>Mammoth Biosciences, San Francisco, CA, USA

14 <sup>3</sup>Anicilia Therapeutics, New York, NY, USA

15 <sup>4</sup>Department of Bacteriology, University of Wisconsin-Madison, Madison, WI, USA

16 <sup>5</sup>Division of Rheumatology, University of Colorado School of Medicine, Aurora, CO, USA

17 <sup>6</sup>Lead Contact

18 \*Correspondence: [breck.duerkop@cuanschutz.edu](mailto:breck.duerkop@cuanschutz.edu)

19

20

21

22

23

24

25

26

27 **SUMMARY**

28 Rheumatoid arthritis (RA) is an autoimmune disease characterized in seropositive individuals by  
29 the presence of anti-cyclic citrullinated protein (CCP) antibodies. RA is linked to the intestinal  
30 microbiota, yet the association of microbes with CCP serology and their contribution to RA is  
31 unclear. We describe intestinal phage communities of individuals at risk for developing RA, with  
32 or without anti-CCP antibodies, whose first degree relatives have been diagnosed with RA. We  
33 show that at-risk individuals harbor intestinal phage compositions that diverge based on CCP  
34 serology, are dominated by Lachnospiraceae phages, and originate from disparate ecosystems.  
35 These phages encode unique repertoires of auxiliary metabolic genes (AMGs) which associate  
36 with anti-CCP status, suggesting that these phages directly influence the metabolic and  
37 immunomodulatory capability of the microbiota. This work sets the stage for the use of phages  
38 as preclinical biomarkers and provides insight into a possible microbial-based causation of RA  
39 disease development.

40

41

42

43

44

45

46

47

48

49

50 **KEYWORDS**

51 Bacteriophages, rheumatoid arthritis, autoimmune disease, microbiome, phage-host interaction,  
52 phage-host metabolism

## 53 INTRODUCTION

54 Rheumatoid arthritis (RA) is a systemic autoimmune disease with a global prevalence of  
55 approximately 1%. The development of RA in at-risk individuals is dependent on a combination  
56 of genetics, epidemiological factors, and systemic immune dysregulation [1]. The heritability of  
57 RA is estimated to be 40–60%, with increased familial risk evident among first-degree relatives  
58 (FDRs) of individuals with diagnosed RA [2, 3]. Analyses of at-risk FDRs, even those without  
59 serum RA-related autoantibodies, have identified patterns of mucosal inflammation whereby  
60 anti-cyclic citrullinated peptide (anti-CCP) antibodies and rheumatoid factors (RF), as well as  
61 cytokines and chemokines, are expressed locally in a subset of individuals [4-6]. In addition,  
62 anti-CCP and RF are present in the blood for years prior to the onset of RA, and their presence  
63 as well as circulating cytokine and chemokine biomarkers, are predictive of future RA  
64 development [7-9]. To probe the mucosal origins hypothesis [1] and the mounting evidence  
65 implicating intestinal microbiota perturbations in RA etiopathogenesis [10], it is necessary to  
66 characterize the ecological associations of the microbiota in at-risk individuals susceptible to  
67 RA.

68 Studies linking the role of the intestinal microbiota to systemic autoimmune diseases  
69 predominantly rely on 16S ribosomal gene analyses of bacteria within the microbiome, and have  
70 expanded our understanding of dysbiosis in the RA intestine. Individuals with established RA  
71 harbor a microbiota dominated by *Prevotella copri* [11, 12], enriched with Gram-positive bacteria  
72 [13], and decreased carriage of bifidobacteria [14], Gram-negative *Bacteroides*, and Firmicutes  
73 [13, 15]. The association of enriched Prevotellaceae, including *P. copri*, has also been  
74 described in individuals with preclinical RA [16], indicating that intestinal *P. copri* is immune-  
75 relevant to the pathogenesis of RA [17]. The presence of *P. copri* may therefore represent a  
76 biological indicator and additional risk factor for RA development and progression [18].  
77 However, associating a single organism to RA etiology neglects the interactions of bacteria with

78 their surrounding environment and other bacterial community members whose populations can  
79 be influenced by predatory bacteriophages (phages).

80 In contrast to the recent enthusiasm for characterizing microbial links to the etiology of  
81 RA, relatively little is known concerning the composition of phage communities in the intestine  
82 as it relates to RA disease risk. Phages of the intestinal microbiota can fluctuate in community  
83 composition in response to immune system function and disease, which suggests that they  
84 could be exploited as biomarkers for early disease detection [19]. Metagenomic sequencing  
85 strategies have revealed extensive and diverse populations of phages in the human intestine  
86 [20-22], in which phage community dynamics correlate with distinct disease states [23-25].  
87 Specific intestinal phage genomic signatures precede autoimmunity development of type 1  
88 diabetes in a cohort of diabetes-susceptible children, with disease-associated phages  
89 correlating to the bacterial component of the microbiota [26]. In addition to the direct impact of  
90 intestinal phages on bacterial community composition via classical predation and prophage  
91 mediated bacterial competition and metabolism, phages also adhere to mucosal surfaces,  
92 significantly impacting microbial colonization [27] and host mucosal immunity development [28].  
93 Evidence is emerging that phages are also immunomodulatory through intrinsic anti-  
94 inflammatory properties, and are capable of direct lymphocyte regulation through the ability to  
95 translocate to multiple tissues and organs [29]. Despite these observations and potential  
96 implications for systemic autoimmune diseases like RA, evaluation of intestinal phages in the  
97 context of RA disease risk has yet to be described.

98 The interplay between intestinal bacteria, their phages, and the host immune system,  
99 whose interactions have consequences not only for compositional dysbiosis but  
100 immunomodulation, must be considered in the etiopathogenesis of RA. The microbiome, and  
101 more recently the virome, have been implicated in a range of human diseases including cancers  
102 [30, 31], inflammatory bowel diseases [32, 33], and arthritis [11, 34]. By characterizing the  
103 phage populations in an at-risk RA FDR cohort; further sub-grouped with regard to autoantibody

104 status as defined by the presence of anti-CCP antibodies and compared to healthy controls, we  
105 have begun to address this question. The cohort contains individuals that do not have  
106 inflammatory arthritis or established RA disease but are FDRs to an individual with diagnosed  
107 RA, which alone increases RA risk. Studying the microbiomes of at-risk individuals in the  
108 preclinical RA state could lead to the identification of biomarkers and therapeutic targets  
109 independent of confounding by the use of drugs in subjects with active arthritis.

110 We used metagenomics to define intestinal phage populations of anti-CCP positive  
111 (CCP+) and negative (CCP-) individuals in an at-risk FDR cohort. Phage matching to bacterial  
112 hosts showed divergent intestinal phage communities dependent on anti-CCP serology status.  
113 We observed an overabundance of phages targeting Bacteroidaceae and Streptococcaceae  
114 bacteria in CCP+ at-risk FDRs as well as phages targeting Bacteroidaceae bacteria in CCP- at-  
115 risk FDRs. Importantly, analysis of the metabolic traits encoded in phage metagenomes  
116 revealed intra-cohort profiles reflecting distinct immunomodulatory potential. Phages with  
117 auxiliary metabolic genes (AMGs) that modify lipopolysaccharide and other outer membrane  
118 glycans of host bacteria were differentially abundant, implicating modifications to bacterial  
119 antigenicity [35] and bacterial fitness [36] in RA-associated communities. Core phage metabolic  
120 genes, including 14 genes which are globally conserved among phages from multiple diverse  
121 environments [37], as well as bacterial surface modifying enzymes, were associated with  
122 phages targeting *Flavonifractor* sp. in the CCP+ cohort and *Bacteroides* sp. in the CCP- cohort.  
123 Phages targeting Lachnospiraceae (*Clostridium scindens*) and Actinomyces (*A. oris*), including  
124 several AMGs, were over-abundant among CCP+ and CCP- individuals, respectively, compared  
125 to healthy controls. Our data show that there are unique and abundant intestinal phages specific  
126 to RA-susceptibility status, and this highlights their potential as biomarkers for preclinical RA  
127 and the need for further pursuit of community-level bacteria-phage interactions during the  
128 development and progression of RA.

129

## 130 RESULTS

### 131 First-degree relatives to individuals with rheumatoid arthritis.

132 A total of 25 human subjects were identified from the Studies of the Etiology of Rheumatoid  
133 Arthritis (SERA) [38], including 16 FDRs of individuals with RA and 9 age and sex matched  
134 healthy controls (HC). FDR subjects for which a detectable level of anti-CCP autoantibody was  
135 present (defined by a value of  $\geq 20$  units/mL in either ELISA assay for anti-CCP3.1 IgA/IgG or  
136 anti-CCP3 IgG (Inova Diagnostics) [39]) were designated the CCP+ group (n = 8). FDRs with no  
137 anti-CCP detected were designated the CCP- group (n = 8) (Table 1). Mean ages for the three  
138 groups in this study were  $61.3 \pm 11.0$  for CCP+,  $49.0 \pm 15.7$  for CCP-, and  $44.4 \pm 13.6$  for HC.  
139 The distribution of sexes for each group is reported as percent female, with 88.9% for CCP+,  
140 62.5% for CCP-, and 66.7% for HC. Among the CCP+ and HC groups, 3/9 and 2/9 of individuals  
141 have reported ever smoking (a risk factor associated with RA), respectively (Table 1).

142

### 143 Generation and curation of *de novo* assembled VLP contigs.

144 We used individual fecal samples from the subjects obtained at the time of autoantibody and  
145 clinical evaluations, and isolated total genomic DNA for shotgun metagenomic sequencing using  
146 an untargeted amplification-independent approach [23, 40]. Samples were physically separated  
147 into whole metagenome (M), including all genomic DNA present in the sample, and virus-like  
148 particle (VLP) fractions, which were subjected to phage-specific precipitation (Figure S1A).  
149 Illumina sequencing resulted in an average of  $123.8 \pm 32.2$ ,  $135.2 \pm 40.4$ , and  $104.7 \pm 45.9$   
150 million (M) paired end reads per sample for CCP+, CCP- and HC whole metagenomes,  
151 respectively, and an average of  $67.3 \pm 29.5$ ,  $73.2 \pm 33.7$ , and  $89.6 \pm 47.8$  M paired reads per  
152 sample for CCP+, CCP- and HC VLP fractions, respectively (Figure S1B). VLP sequencing  
153 reads were used for *de novo* contig assembly of VLP metagenomes. In total, 3.56 M contigs  
154 were assembled and pooled from the 25 individual metagenomes, with 80,762 contigs longer

155 than 5 kb (Figure 1A). VLP contigs longer than 5 kb were distributed evenly across the three  
156 sample groups, totaling  $2908.6 \pm 1461.3$ ,  $3209.0 \pm 2573.8$ , and  $3535.7 \pm 2826.4$  contigs per  
157 sample for CCP+, CCP- and HC respectively (Figure S1C).

158 These 80,762 contigs served as a starting point for identifying putative phages using a  
159 three-pronged approach of independent phage discovery methods (Figures 1A and S1D). The  
160 first method (P/M ratio) employed a previously validated read mapping strategy whereby VLP  
161 read sets from all 25 samples were mapped to both whole metagenome (M) and VLP (P)  
162 contigs [23]. Using the read-mapping P/M ratio (see Methods), we identified 2,117 unique  
163 putative phage contigs after dereplication at 95% sequence identity. Next, we identified an  
164 independent set of phage contigs by aligning all open reading frames (ORFs) of the 80,762 VLP  
165 contigs against a set of 25,281 curated viral protein families (VPFs) [41]. Using this VPF  
166 method, several filters were applied to identify viral contigs; (i) 2,902 contigs were identified as  
167 having 5 or more VPF hits and non-viral Pfam hits below 20% of total ORFs on a contig, (ii) 263  
168 contigs were identified with 5 or more VPF hits and less than 50% non-viral Pfam hits on a  
169 contig, (iii) 644 contigs with 2-4 VPF hits and 0 non-viral Pfams, (iv) 976 contigs with at least 1  
170 VPF hit, without considering any non-viral Pfams. In total, after dereplication, the viral contigs  
171 arising from all above filters resulted in 4,785 unique viral contigs. For the third and final  
172 approach we employed VIBRANT (Virus Identification By iteRative ANnoTation), a sequence-  
173 independent algorithm that uses neural networks of viral protein signatures to identify lytic and  
174 lysogenic phages [37]. Using VIBRANT, we identified 4,758 unique viral contigs.

175 To consolidate this list, we identified contigs that were shared between all three phage  
176 discovery methods, resulting in a curated list of 660 contigs (Figures 1A and 1B). This curated  
177 list of putative phage contigs range in size from 5,007 bp to 557,525 bp. To assess host  
178 bacterial contamination among these contigs, we employed CheckV, a pipeline for assessing  
179 the quality of viral genomes [42]. CheckV analysis revealed a reduced level of host bacterial  
180 contamination and an increase of pure viral genomes in the final list of 660 curated contigs as

181 compared to varying levels of contamination among the three separate methods prior to contig  
182 overlap identification (Figure 1C). We estimated completeness of our curated contigs using  
183 CheckV and determined a greater distribution of “high quality” contigs relative to contig length,  
184 in comparison to the three independent methods (Figure S2) [43]. Further, using the VIBRANT  
185 platform for integrated provirus prediction, we describe communities of predominantly lytic viral  
186 genomes belonging to Siphoviridae morphology (Figure S3). By using a combination of  
187 approaches for viral contig discovery and assessing the overlap among these methods, we  
188 have extracted a set of 660 predicted phages which are of overall high quality, both in terms of  
189 viral contig completeness and lack of bacterial contamination than those from each of the  
190 individual methods (Figures 1C and S2), which to date have been used primarily in isolation to  
191 identify and characterize viral metagenomes.

192

### 193 **Clustering of metagenomic viral contigs reveals distinct viral ecological composition.**

194 Next we compared our set of curated contigs to over 2.3 million viral whole genome and  
195 metagenome sequences from the IMG/VR database [44]. We used blastn at a threshold of 95%  
196 sequence identity over 85% of 1 kb sequence length and Markov clustering to group our contigs  
197 with related sequences from IMG/VR. Of the 660 contigs, 346 (52.4%) clustered into 255  
198 clusters that contained 7,736 additional metagenomic viral contigs (mVCs) from IMG/VR. The  
199 remaining 314 contigs (47.6%) were classified as singletons, with an even distribution among  
200 CCP cohorts compared to healthy controls (Figure S4A). Of the curated contigs that were  
201 clustered, cluster sizes ranged from 2 to 646 members with 78.4% of the groups containing  
202 more than 2 partners and 36.5% containing more than 10 members, and 65.9% between 2 – 10  
203 members (Figure S4B). Among these 255 clusters, 14 included reference prophages and lytic  
204 phages, and 318 (48.2%) clustered with classified mVCs, thus assigning multiple levels of  
205 taxonomy to our contigs (Figures 2A, 2B, and Supplementary Table 1).



206           Although host assignments were made using sequence-based clustering, host  
207 specificity was further determined by aligning Clustered Regularly Interspaced Short  
208 Palindromic Repeat (CRISPR) spacer sequences to our 660 curated contigs. CRISPR-Cas  
209 serves as a snapshot of previous phage infections in the form of acquired spacer sequences  
210 that represent invading viral genomes [45], and these sequences can be used for accurate  
211 identification of phage-host interactions in intestinal microbiomes [23, 46]. CRISPR spacer host  
212 assignments at the family level were present in 207 of 660 contigs (31.4%). All CRISPR spacer  
213 queries considered for these analyses, ranging in length from 18 to 70 bp, were matches of  
214 93.1–100% identity across the full length of the query and allowing for 0–2 mismatches and up  
215 to 1 gap throughout [47] (Supplementary Table 2). Among predicted phages, total assigned  
216 CRISPR spacers were evenly distributed, yet CCP+ sample containing phages predicted to  
217 target Lachnospiraceae, Ruminococcaceae, Streptococcaceae, and Veillonellaceae bacterial  
218 families were disproportionately abundant (Figures 2A and 2B). In total, 21 bacterial families  
219 were identified as hosts via CRISPR spacer matching, supplementing the phage-host  
220 interactions discerned from sequence-based clustering (Figure 2A). Among all samples in this  
221 study, phages were predicted to target Lachnospiraceae, Ruminococcaceae, Clostridiaceae and  
222 Bacteroidaceae bacteria with highest frequency of total CRISPR spacers (Figure 2A). Phage-  
223 host interactions were also measured in terms of host range specificity, showing that while the  
224 majority of the phages were predicted to have narrow host ranges, several spacers were linked  
225 to multiple hosts across family level and higher taxa (Figure 2C), consistent with prior  
226 observations of diverse viromes [47]. Broad host range phages were found across all cohorts,  
227 but particularly among CCP+ sample contigs (Figure 2D) suggesting a more dysbiotic  
228 community of host bacteria among these individuals' metagenomes.

229           We further explored the association of sample cohorts to phage hosts using read  
230 mapping to determine differential host abundance profiles (Figure 3). Reads from all samples  
231 were mapped to assembled phage contigs whose host assignments were deduced using

232 CRISPR-spacer matching and Markov clustering to quantify sequence abundances by  
233 measuring cohort-based read recruitment [23, 48-50]. In comparing the differential read  
234 recruitment to phages predicted to infect separate bacterial families, we observed differences  
235 based on reads originating from either the CCP+ or CCP- groups in relation to the HC cohort  
236 (Figure 3). Among the most striking, phage contigs targeting Bacteroidaceae recruited  
237 significantly more reads from CCP+ viromes than either HC or CCP- individuals (Figure 3A). In  
238 contrast, phages predicted to target Clostridiaceae bacteria were evenly abundant across all  
239 three groups (Figure 3B). For Lachnospiraceae bacteria, CCP+ phages recruited were evenly  
240 distributed among the groups with a slight elevation in CCP+ individuals that was not statistically  
241 significant (Figure 3C). Ruminococcaceae phages were significantly skewed when comparing  
242 HC to CCP- individuals (Figure 3D) and a major shift in phage read recruitment abundance was  
243 evident for Streptococcaceae phages, as a greater percentage of total CCP+ reads were  
244 mapped to these phages in relation to either HC or CCP- virome reads (Figure 3E). This skew  
245 among CCP+ individuals is supported by prior works showing elevated Streptococcal phage  
246 abundances in intestinal viromes of humans with inflammatory bowel disease [32] and a murine  
247 model of colitis [23]. Lastly, no significant differences were observed for read recruitment to  
248 Veillonellaceae-targeting phages (Figure 3F). Thus, differences in the host specificities were  
249 evident between CCP+, CCP-, and HC groups with respect to read mapping abundance profiles  
250 for Bacteroidaceae, Ruminococcaceae, and Streptococcaceae phages.

251

252 **CRISPR spacer host metadata reveal CCP+ phages represent greater variability in**  
253 **microbial host ecology.**

254 To further explore the phage ecology from our subject cohort, we analyzed the host and mVC  
255 metadata from the Joint Genome Institute's (JGI) Genomes OnLine Database (GOLD) [51]. The  
256 JGI GOLD database contains metadata from over 100,000 biosamples and over 350,000  
257 sequencing projects involving genomic and metagenomic sequencing data from biological

258 isolates worldwide. Moreover, recent work has contributed an additional 52,515 metagenome-  
259 assembled genomes from diverse ecologies and geographic distributions [52], further  
260 enhancing microbial host ecosystem analysis. Using the GOLD Biosample Ecosystem  
261 Classification system, we analyzed the ecosystem distributions for all CRISPR spacers  
262 identified in our curated contig list and discovered that the majority of host assigned contigs fell  
263 within four distinct ecosystem classification levels; from broad to specific environments: host-  
264 associated, human-associated, digestive system, and large intestine (Figure 4). For phages that  
265 were previously identified as having CRISPR spacer host assignments, total spacer alignments  
266 as identified by blastn ranging from 1 to 825 per contig, were tallied and used to calculate the  
267 uniformity of spacer origins per contig (Supplemental Table 3). For each of the four ecosystem  
268 categories, the most abundant classifications were used to compare across the study cohorts.  
269 At the highest order GOLD Ecosystem distribution, the host-associated (i.e., human, mammal,  
270 plant, arthropod, fungi) origin classification per contig was comparable for the HC and CCP-  
271 groups but not for the CCP+ group (Figure 4A). A similar pattern was evident at the lower order  
272 metadata distributions, with phage contigs derived from CCP+ individuals being more divergent  
273 from the other cohorts for contigs of human-associated origin (Figure 4B), digestive system  
274 origin (Figure 4C), and large intestine origin for the Ecosystem Subtype (Figure 4D).

275         These compositions of multiple CRISPR spacer ecosystem distributions reveal  
276 homogeneity among phages derived from HC and CCP- samples, and indicates more dysbiotic  
277 communities across CCP+ samples, suggesting that CCP+ individuals harbor disparate phage  
278 communities that are more likely to originate from non-host associated sources. The putative  
279 origins of these phages are related to environmental metadata of CRISPR spacers in the JGI  
280 GOLD database describing the origin of bacterial DNA samples across ecologically diverse  
281 biomes worldwide [52]; and increased heterogeneity in the CCP+ phages suggests a condition-  
282 dependent host intestinal environment that maintains diversity. At the highest Ecosystem  
283 classification level, with only three unique classification terms, these non-host associated

284 sources that are more prevalent in the CCP+ group, correspond to a higher degree of spacers  
285 matching organisms originating from environmental and/or engineered habitats as archived in  
286 GOLD (Figure S5). The ecosystem distributions of Category, Type, and Subtype have 43, 126,  
287 and 146 unique terms for each classification level respectively, indicating multiple possible  
288 combinations for organism habitats. Thus, our analysis of GOLD metadata for all phages with  
289 predicted host isolates within our study reveals divergent habitat origins for CCP+ derived  
290 contigs.

291

292 **Quantitative read mapping reveals differentially abundant contigs despite sample**  
293 **cohesiveness.**

294 We next asked whether certain phage community members are present in different abundances  
295 among the members of the cohort at-risk for rheumatoid arthritis compared to healthy controls.  
296 To assess differences between phages among the sample groups, we used a viral read  
297 recruitment strategy whereby VLP reads from all samples were mapped to the 660 curated  
298 contigs [23, 48]. Using read count matrices for all contigs as input in the DEseq2 statistical  
299 package for differential analysis of comparative count data [53], we analyzed three pairwise  
300 comparisons for over- or under-abundant viral contigs (Figure 5). Initial comparisons of the  
301 normalized and log-transformed count matrices were performed to evaluate the experiment-  
302 wide trends across all samples. Principal component analyses reveal minimal variance  
303 explained by the first two principal components for CCP+ vs HC samples (Figure 5A), CCP- vs  
304 HC samples (Figure 5B), and CCP+ vs CCP- samples (Figure 5C), indicating that total sample  
305 community signatures cannot be readily differentiated based on at-risk or healthy control  
306 cohorts. We further explored the sample similarities by comparing Euclidian sample-to-sample  
307 distances of the regularized log-transformed count matrices. Hierarchical clustering of sample-  
308 to-sample distances did not reveal any discernable clustering for CCP+ vs HC samples (Figure  
309 5D), and only minimal similarities between two CCP- samples when compared to the HC

310 (Figure 5E) and CCP+ (Figure 5F) groups, suggesting general sample cohesiveness between  
311 cohorts.

312 We next analyzed specific members of the intestinal phage community, considering the  
313 rationale that samples with complex communities are better explored at the level of each unique  
314 member [33]. Visualization of the principal components incorporating the viral identification  
315 metrics used in the VIBRANT neural network for our 660 curated contigs shows minimal  
316 differentiation among phage scaffolds based on scaffold quality (Figure S6A) or predicted phage  
317 state (i.e., lytic or lysogenic) (Figure S6B), although fragmentation of smaller sized contigs is  
318 evident for both analyses. Further, grouping of contigs at the sample type level does not  
319 differentiate any specific cluster (Figure S6C), which is consistent with the minimal variance  
320 observed at the sample level (Figures 5A, 5B, and 5C). Finally, we assessed the differential  
321 abundance of read recruitment counts for the set of 660 contigs and estimated fold changes  
322 based on the negative binomial generalized linear model provided by DESeq2 [53]. Using  
323 thresholds of log<sub>2</sub>-fold change greater than 1 or less than -1 (equivalent to fold change of  $\pm 2$ )  
324 and Benjamini-Hochberg adjusted *p*-values < 0.001, we identified a total of 178 differentially  
325 abundant contigs (27% of the 660 phages) across three pair-wise abundance comparisons. For  
326 CCP+ vs HC samples a total of 59 contigs (30 over- and 29 under-abundant) (Figure 5G), for  
327 CCP- vs HC a total of 66 contigs (27 over- and 39 under-abundant) (Figure 5H), and for CCP+  
328 vs CCP- a total of 53 contigs (27 over- and 21 under-abundant) (Figure 5I) passed our  
329 thresholds for significance. This suggests that there are unique changes in select phage  
330 abundances from the intestinal viromes of individuals at risk for RA, and that these changes are  
331 more nuanced than sample-based community associations can reveal. These data indicate that  
332 these cohort groups represent minimal sample-sample variation, but may provide clues related  
333 to detection of biomarkers via specific community members. The top phage contigs associated  
334 with either CCP+ or CCP- individuals were *Clostridium scindens* (Lachnospiraceae) and

335 *Actinomyces oris* (Actinomycetaceae), respectively, over-abundant at log<sub>2</sub> fold changes of 25.9  
336 and 23.5 compared to the healthy control samples.

337 A comparison of the bacterial relative abundances via 16S amplicon sequencing  
338 confirmed an expansion of Lachnospiraceae bacteria among samples originating from CCP+  
339 individuals (Figure S7A). This confirms, in part, observations of over-abundant  
340 Lachnospiraceae-targeting phage contigs for the CCP+ but not CCP- cohorts (Figures 6B and  
341 6C). The bacterial composition across all cohorts was relatively even in terms of richness  
342 (Figures S7B and S7C), evenness (Figure S7D), and species diversity (Figure S7E).  
343 Conversely, phage host abundances in the CCP- cohort relative to healthy controls were not  
344 correlated to a family-level differentiation in bacterial taxa relative abundance.

345

346 **Phage auxiliary metabolic gene abundances highlight cohort-associated disparities in**  
347 **metabolic potential.**

348 To determine the functional potential and metabolic capabilities within intestinal phages, we  
349 quantified AMGs assigned to specific metabolic pathways in the Kyoto Encyclopedia of Genes  
350 and Genomes (KEGG) database across at-risk and healthy cohorts. Since their identification as  
351 viral drivers of host metabolism [54], phage-encoded AMGs have been recognized as  
352 consequential actors that redirect host functional capacities thereby directly influencing local  
353 ecology [55, 56]. Analyses of AMGs using VIBRANT and KEGG pathway annotations can  
354 provide valuable insights into potentially altered metabolic functions or informative biosignatures  
355 for cohort-associated microbial communities [37, 57]. To this end, we assessed our set of  
356 curated phage contigs against 2,835 AMGs with KEGG annotations identified as “metabolic  
357 pathways” or “sulfur relay system” [37]. Among our 660 phage contigs, 161 (24%) were found to  
358 encode at least 1 AMG, with 252 AMGs in total across all samples (Supplemental Table 4).  
359 Phages originating from the HC cohort accounted for 131 metabolic signatures, while CCP+ and  
360 CCP- had less total AMGs with 77 and 44, respectively (Figure S8A). Among the most

361 represented metabolic categories across all phages, amino acid metabolism and the  
362 metabolism of cofactors and vitamins contained 121 and 88 AMGs, respectively, with energy  
363 metabolism being the next largest category with 22 AMG hits (Figure S8B). These general  
364 pathway results indicate that phages in the intestine presumably affect host metabolism through  
365 the consumption of metabolic resources needed for their own biogenesis, as described in  
366 phage-host infection studies of model pathogens [58-60] and marine virocells [61].

367 To further probe all metabolic phage-encoded functions corresponding to our sample  
368 cohorts, we assessed all AMG hits for total KEGG pathway abundances. Hierarchical clustering  
369 grouped AMGs into 5 distinct metabolic clusters relative to HC and at-risk CCP cohorts (Figure  
370 6A). Among these groups, the gene coding for *phnP* (K06167) stands apart from the others,  
371 both in terms of clustering and also for relative pathway abundance (Figure 6A). Among group-  
372 associated differences in AMG pathway abundances, there are notable absences among both  
373 CCP+ and CCP- individuals. Namely, several clustered transferases such as the mannose-  
374 phosphate transferases (*algA*, *xanB*, *rfaA*, *wbpW*, *pslB*), manno-heptose transferases (*gmhC*,  
375 *hldE*, *waaE*, *rfaE*), and the *galE* epimerase and *glmS* transaminase (Figure 6A). Considering the  
376 impact of such transferases on bacterial cell wall polysaccharides and biofilm formation [62, 63],  
377 these results point to a baseline of phage-driven bacterial surface modifications from HC-  
378 derived phages. Conversely, AMGs involved in lipopolysaccharide (LPS) biosynthesis such as  
379 the *waaL* O-antigen ligase and the *gmhB* phosphatase are only present in CCP+ phages or at  
380 greater abundance in CCP+ phages, respectively, indicating a possible role in immune evasion.  
381 Within the CCP- cohort, one of the most abundant AMGs, KEGG orthology entry K23144  
382 encoding for a polyketide sugar transferase important in peptidoglycan biosynthesis is  
383 completely absent from the HC cohort and present at lower levels for CCP+ samples. Thus,  
384 phage-encoded bacterial surface modifying enzymes such as the sugar transferases and  
385 LPS/peptidoglycan biosynthetic genes, are differentially represented across the cohorts in this

386 study, which has implications for bacterial fitness in the intestinal ecosystems and their  
387 interactions with the immune system.

388 We next incorporated the AMG characterization of genomes within our curated set of  
389 phages to those that were significantly over- or under-abundant in previous differential  
390 abundance analyses (Figures 5G, 5H, and 5I). Among the 20 differentially abundant contigs  
391 from the CCP+ vs HC pairwise comparison that contained CRISPR spacer-predicted hosts, 8 of  
392 these encoded at least one AMG (Figure 6B). The 9 under-abundant phages in this comparison  
393 encode 5 AMGs, including manno-heptose transferases (*gmhC*, *hldE*, *waaE*, *rfaE*), mannose-1-  
394 phosphate transferases (*algA*, *xanB*, *rfaA*, *wbpW*, *psIB*) and *ahbD* AdoMet-dependent heme  
395 synthase all together on 1 contig, and *cysH* and *iscS* genes on 2 other contigs (Figure 6B).  
396 Among the 11 significantly over-abundant contigs, 3 of these encode the *phnP*  
397 phosphodiesterase; 3 phages predicted to infect *Flavonifractor* sp. (Ruminococcaceae) and one  
398 predicted to infect Clostridiales bacteria. The remaining AMG found in CCP+-associated over-  
399 abundant phages encodes for a cobalamin biosynthesis protein *cobS*, found in marine  
400 cyanophages [64], viruses of marine archaea [65], and is considered a core component of  
401 marine phage genomes [66], but also ubiquitous in phage genomes that infect *E. coli* [67]. Our  
402 identification of a CCP+ over-abundant phage contig targeting *Bacteroides fragilis* and carrying  
403 the *cobS* AMG (Figure 6B) reinforces the universal nature of this central AMG that is conserved  
404 across hosts and environments [37].

405 We also identified 16 unique phage contigs with definitive CRISPR spacer-predicted  
406 hosts that were differentially abundant and associated with the CCP- cohort (Figure 6C). Within  
407 these contigs, 9 are significantly under-abundant compared to healthy controls, with 3 of these  
408 encoding AMGs. CCP- associated phages were identified as carrying *cobS*, *DNMT3A*, *thiF*, and  
409 *iscS* metabolic genes (Figure 6C). Thus, in contrast to CCP+ associated contigs which harbored  
410 *phnP* and *cobS* on a combination of Lachnospiraceae, Ruminococcaceae, and



411 Bacteroidaceae targeting phages, CCP- associated phages were identified to target primarily  
412 Bacteroidaceae and *Actinomyces oris* and harbor a combination of AMGs.

413

## 414 **DISCUSSION**

415 RA is a complex disease with an unknown etiology that puts a burden on quality of life resulting  
416 in a strong societal impact [68, 69]. In addition to multiple epidemiological factors being  
417 associated with RA development, including genetic and familial risk, environmental risk factors  
418 and biological sex [3], the microbiota remains an important and understudied factor that likely  
419 influences RA autoimmunity [70]. Given the widespread occurrence and diversity of phages in  
420 the human intestinal microbiota and their impact on intestinal microbial ecology during health  
421 and disease [19, 20, 71], we analyzed this previously neglected component of the microbiota as  
422 it relates to RA etiopathogenesis. We used shotgun metagenomics to identify intestinal phages  
423 of individuals at risk for developing RA and discovered an association of distinct phage  
424 communities with RA-specific serology in the at-risk population.

425       Using three separate database-independent approaches, we describe a collection of 660  
426 phage genomic sequences, their potential metabolic capability, and their differential abundance.  
427 Through a combination of CRISPR spacer matching and Markov clustering with other viral  
428 metagenomic sequences from diverse environments, we predicted host assignments for 285 or  
429 43.2% of these phages, which is a high level of taxonomic assignments relative to recent  
430 reports of approximately 10 – 30% host assignment identification [23, 48, 72]. By analyzing a  
431 core set of *de novo* assembled phage contigs paired with taxonomy, we identified differential  
432 phage communities associated with the at-risk RA individuals compared to healthy controls, all  
433 while adding novel phage-host assignments to previously unidentified intestinal phages [73, 74].

434       Phage-host assignments were dominated by Lachnospiraceae-targeting phages, some  
435 of which were over-abundant in CCP+ individuals. This expansion of phages also correlated  
436 with increased abundances of Lachnospiraceae bacteria in the CCP+ cohort compared to either

437 CCP- or the healthy cohort, suggesting a link to this family of Firmicutes and CCP autoantibody  
438 production in the human intestine. Interestingly, increased abundance of Lachnospiraceae has  
439 been observed in at least two previous studies of intestinal microbiotas in mice during the  
440 course of collagen-induced arthritis (CIA) [75, 76]. Considering the precedence for overlap of  
441 identified phage contigs from mouse intestines to human-associated intestinal phages [23], the  
442 previously-reported increase in abundance of Lachnospiraceae bacteria during experimental  
443 arthritis in mice is supported by our findings of increased Lachnospiraceae phage-host  
444 interactions in CCP seropositive individuals at-risk for developing RA. To this end, given that the  
445 FDR individuals included in this study do not show clinical signs of established RA, our  
446 identification of a preclinical cohort with increased Lachnospiraceae phage-host interactions  
447 could serve as a biological indicator of disease. Similarly, an expansion of Bacteroidaceae-  
448 targeting phages associated with the CCP- cohort was described, which corresponds to a  
449 previously observed expansion of Bacteroidaceae bacteria following CIA in mice [75]. In  
450 addition to these phages serving as potential biomarkers of disease in humans at risk for RA,  
451 our data indicate that Bacteroidaceae and Lachnospiraceae-targeting phages designate a  
452 distinction between CCP serology status that may serve as an additional indicator of disease  
453 progression and/or future disease severity [77]. Notably, bacteria in the Lachnospiraceae and  
454 Ruminococcaceae families have been linked to the pre-diabetic intestinal microbiota and  
455 diabetic pathogenesis, while Bacteroidaceae are associated with disease protection in a murine  
456 model of diabetes [78]. The identification of cohort-specific phage-host interactions sheds light  
457 on potential preclinical biomarkers connecting specific dysbiotic intestinal microbial communities  
458 to possible regulation of microbiota-mediated mucosal inflammation [1, 79].

459 We calculated the differential abundance of curated phages on a contig-to-contig basis  
460 to estimate dispersion and fold changes of quantitative read mapping matrices. In doing so, we  
461 identified 178 differentially abundant contigs (27% of the total curated list) across three pair-wise  
462 cohort comparisons. Among the CCP+ vs HC comparison, we observed over-abundant phages

463 targeting *Clostridium scindens*, *Flavonifractor* sp., *Actinomyces oris*, as well as other family-level  
464 taxonomic assignments. A member of the Lachnospiraceae, *C. scindens* is an intestinal  
465 commensal bacterium involved in maintaining homeostatic large intestinal bile acid composition  
466 and providing host protection from opportunistic *Clostridioides difficile* blooms [80, 81]. A  
467 differential abundance of phage targeting *C. scindens* in the CCP+ at-risk cohort, may have  
468 implications for bile acid dysmetabolism in these individuals, which has consequences for  
469 inflammatory bowel diseases [82, 83]. Differential abundance of phages in the CCP- cohort  
470 revealed several phages targeting Bacteroidaceae and *Bacteroides* species, bacteria involved  
471 in multiple reactions of bile acid metabolism promoting host metabolic health [84, 85]. Recent  
472 phage-*Bacteroides* interactions have described the influence of phage BV01 in reducing  
473 *Bacteroides* bile acid metabolism [86], which has implications for the impact of phages on  
474 mammalian gut metabolic function. Our findings suggest individuals at risk for RA harbor  
475 divergent communities of phages with potential to alter intestinal metabolic potential through  
476 either reduction of key bacterial species and thus reducing endogenous metabolic function, or  
477 through the phage-derived introduction of specific AMGs.

478         Changes to the intestinal metabolome can lead to compositional microbiota transitions  
479 that in turn impact host nutrient uptake and immune homeostasis [87]. Considering that  
480 manipulations of microbial metabolic pathways in the intestine can influence inflammation and  
481 dysbiosis [88], our identification of phage communities with differential abundances of encoded  
482 AMGs points to divergent metabolic landscapes associated with at-risk RA cohorts. A majority  
483 of the AMGs identified in our analysis make up a group of 14 genes conserved across many  
484 environments [37], indicating their functional importance in core metabolism. We were surprised  
485 to identify three phages that were over-abundant in the CCP+ cohort (3 of 11 in total), three with  
486 *Flavonifractor* sp. predicted hosts and one Clostridiales-targeting phage, encoding the *phnP*  
487 phosphodiesterase. Encoding a phosphoribosyl 1,2-cyclic phosphate phosphodiesterase, *phnP*  
488 accounts for 10% of the total AMGs represented in our phage genomes, and is differentially

489 abundant among the CCP+ cohort samples. While *phnP* is one of 14 genes considered to be  
490 globally conserved across multiple environments [37], it is the only gene among AMGs in our  
491 analysis that is the lone representative of its pathway. The PhnP phosphodiesterase, part of a  
492 14-gene operon originally described in *Escherichia coli*, plays a crucial intermediary role in the  
493 carbon-phosphorous lyase pathway by degrading a dead-end cyclic phosphonate byproduct  
494 [89]. The uniform presence of *phnP* across phages derived from at-risk and healthy cohorts  
495 (Figure 6A), suggests phage-driven organophosphonate degradation, which is fundamental for  
496 bacteria in diverse environments [90].

497         Phosphonate degradation is important for phosphorus assimilation in enteric bacteria  
498 [91], although phosphonate metabolism has not been described for *Flavonifractor* species and a  
499 *phnP* homolog is not available for this genus in the KEGG database (K06167). In a recent study  
500 characterizing microbiota KEGG orthologs as predictors of methotrexate responsiveness for RA  
501 treatment, a gene in the phosphonate transport system, *phnC* (K02041), exhibited high median  
502 random forest importance as a predictor of drug response in new-onset RA subjects [92]. The  
503 contribution of the phosphonate metabolic pathway in bacteria and phages, will require further  
504 exploration in the context of RA pathogenesis and treatment. However, it is possible that these  
505 phage-encoded metabolic products are supplementing phosphorous uptake among  
506 Ruminococcaceae and Lachnospiraceae bacteria that predominate in CCP+ individuals prior to  
507 RA clinical symptoms. Our analysis is limited in that we did not measure a longitudinal  
508 progression of microbial metabolic pathways in these human samples, yet these metabolic  
509 associations warrant further investigations into causality and the potentially cascading effects on  
510 interbacterial interactions [93].

511         Our results point to divergent communities of phages with multiple bacterial host targets  
512 that group according to anti-CCP serology in individuals predisposed to developing RA. These  
513 at-risk individuals who develop seropositive RA, a disease manifestation that is more severe  
514 [94] and less responsive to treatment [95], endure a prolonged asymptomatic period before

515 pathological early RA develops in those who are at a higher disease susceptibility in the  
516 preclinical RA state [1]. Current approaches for RA diagnosis rely in large part on anti-CCP  
517 serology which has up to 93% specificity but as low as 67% sensitivity (for the CCP3.1 assay  
518 used here) [39], indicating that a negative result does not preclude current or development of  
519 clinically apparent RA. Phage community composition analyses may complement existing  
520 diagnoses for RA, considering that intestinal phages can play important roles in immune  
521 tolerance, mucosal immunity, and microbial homeostasis [96]. Given that phage community  
522 alterations have been shown to precede autoimmunity development in children at risk for  
523 developing type 1 diabetes [26], phage community structure should be considered as a  
524 biomarker for diseases such as RA that are influenced by non-genetic microbial factors [19]. To  
525 that end, we have characterized the intestinal viromes of RA at-risk individuals corresponding to  
526 anti-CCP serology status. Furthermore, we calculated species-specific phage-host interactions  
527 and identified over-abundances of *C. scindens* and *A. oris* targeting phages in CCP+ and CCP-  
528 individuals, respectively. Divergent metabolic profiles evident by differential abundance of AMG-  
529 encoding phages in both conditions warrant further interrogation during models of RA-like  
530 disease. Future work should investigate the potential of phages in a murine CIA model to  
531 determine the influence of RA-associated phages with immunomodulation and inflammatory  
532 disease progression. Our multifaced approaches for phage prediction and phage host  
533 assignments hold promise to better ascertain the occurrence and diversity of the virome and the  
534 identification of key phages influencing the microbiota and individuals at risk for developing RA  
535 autoimmune disease. This RA-focused study implicating specific phage populations could open  
536 new avenues to assess the basis for phage implication in other microbiota dysbiosis-associated  
537 diseases.

538

## 539 **RESOURCE AVAILABILITY**

### 540 **Lead Contact**

541 Further information and requests for resources and reagents should be directed to and will be  
542 fulfilled by the Lead Contact, Breck A. Duerkop ([breck.duerkop@cuanschutz.edu](mailto:breck.duerkop@cuanschutz.edu)).

543

#### 544 **Materials Availability**

545 This study did not generate new unique reagents.

546

#### 547 **Data and Code Availability**

548 The VLP and whole metagenome DNA sequencing reads as well as the final curated phage  
549 contigs generated in this study are available at the European Nucleotide Archive under the  
550 Study titled “Intestinal VLP reads and predicted phage contigs for at-risk RA individuals”  
551 (accession numbers PRJEB42612 and ERP126498). The VLP and whole metagenome raw  
552 unmapped read sets are available for each of the 25 individual samples included in this study  
553 and are available under the Study Primary Accession PRJEB42612. The 660 curated contigs  
554 are compiled in a multifasta file deposited as Sample SAMEA7856466 under the same Study  
555 PRJEB42612.

556

### 557 **EXPERIMENTAL MODEL AND SUBJECT DETAILS**

#### 558 **Study Subjects and Fecal Samples**

559 Fecal samples were obtained from individuals recruited for the SERA (Studies of the Etiology of  
560 Rheumatoid Arthritis) initiative, aimed at understanding the mechanisms that prelude the  
561 preclinical development of RA. SERA is a multicenter prospective cohort study that has  
562 identified first-degree relative (FDR) probands defined as a parent, full sibling, or offspring of  
563 individuals with diagnosed clinical RA [38]. FDR probands were evaluated in extensive clinical  
564 research visits, longitudinal follow-ups, and autoantibody testing to determine CCP status [38].  
565 FDR probands were split into cohorts dependent on serum CCP levels, with 100% of subjects in  
566 the CCP+ cohort positive and 0% of subjects in either CCP- or HC (Healthy Control) cohorts

567 testing positive. Healthy control subjects were recruited and included in this study as described  
568 previously [97]. The present study consisted of 25 subjects split into 3 cohorts, of which 8 were  
569 CCP+, 8 were CCP-, and 9 were HC. Ethical approval for this study was obtained from the  
570 University of Colorado Multiple Institutional Review Board (COMIRB) study numbers 01-675  
571 (primary) and also 13-2606 and 14-1751. COMIRB Protocol 01-675 included informed consent  
572 with HIPAA authorization for stool sample collections. Stool samples were obtained  
573 independently by SERA study participants and returned within 1 week of their original visit.  
574 Samples were stored in aliquots at -20°C until processing.

575

## 576 **METHODS**

### 577 **Extraction of Fecal Whole Metagenome and VLP DNA, Library Preparation and** 578 **Sequencing**

579 Whole metagenome and VLP fraction DNA were isolated as described previously [98], with  
580 some modifications as follows. For all samples, 0.1 g of human stool was homogenized in 8 mL  
581 salt magnesium plus (SM+) buffer [99] and 0.5 ml of homogenate was transferred to a  
582 BashingBead Lysis tube (Zymo) and designated as the whole metagenome sample. Whole  
583 metagenome DNA was extracted using a ZymoBIOMICS DNA kit (Zymo) following the  
584 manufacturer recommended protocol. VLPs were clarified from the remaining 7.5 mL of sample  
585 by three successive centrifugation steps (3200g for 10 min, 3200g for 10 min, 7800g for 10  
586 min), and the supernatant was filtered through a 0.45- $\mu$ m PVDF filter membrane. VLPs were  
587 precipitated by adding 0.5M NaCl and 10% wt/vol PEG8000 and incubating on ice at 4°C  
588 overnight, followed by centrifugation (7800g for 20 min). VLP pellets were resuspended in 400  
589  $\mu$ L SM+ buffer and treated with 40  $\mu$ L DNase buffer (10 mM CaCl<sub>2</sub>, 50 mM MgCl<sub>2</sub>), 25 units  
590 DNase, and 15 units RNase for 1 hr at 37°C. VLPs were further treated with 50 mg/mL  
591 proteinase K and 0.5% SDS for 30 min at 56°C before addition of 100  $\mu$ L phage lysis buffer (4.5  
592 M guanidiniumisothiocyanate, 44 mM sodium citrate pH 7.0, 0.88% sarkosyl, 0.72% 2-

593 mercaptoethanol) and incubated for 10 min at 65°C. VLP DNA was precipitated and extracted  
594 with an equal volume of phenol/chloroform/isoamyl alcohol 25:24:1, spun at 7800g for 5 min,  
595 and further extracted with an equal volume of chloroform. VLP DNA was precipitated with 0.3M  
596 NaOAc (pH 5.2) and an equal volume of isopropanol, washed with ice-cold 70% ethanol, and  
597 resuspended in sterile water.

598

### 599 **Metagenomic DNA Sequencing**

600 VLP and whole metagenomic DNA was sequenced using the Illumina NovaSEQ 6000 platform  
601 with paired-end 150-cycle sequencing chemistry. DNA libraries were amplified using the  
602 Ovation Ultralow System v2 (Nugen, part no. 0334) library preparation kit including 12 cycles of  
603 amplification. TruSeq adapters (Illumina) were used for multiplexing. Libraries were quantified  
604 using a Qubit and quality was measured using a TapeStation. All library preparation,  
605 quantification, quality assessment and control, were performed by the University of Colorado  
606 Anschutz Medical Campus Genomics and Microarray Core.

607

### 608 **16S rRNA Amplicon Sequencing and Analysis**

609 16S rRNA gene analysis was performed using fecal samples that were processed for isolation  
610 of whole metagenomic DNA using a ZymoBIOMICS DNA kit (Zymo) and stored at -80°C.  
611 Amplicons of the 16S rRNA gene V4 region were amplified using Earth Microbiome Project  
612 primers 515F and 806R [100] with custom barcodes. Samples were sequenced on the Illumina  
613 MiSeq platform with paired end 250 bp reads using bTEFAP technology [101] by MR DNA  
614 (Molecular Research LP, Shallowater, TX), and processed using mothur v.1.44.0 [102].  
615 Sequenced reads, which averaged  $607,915 \pm 112,641.7$  per sample, were demultiplexed,  
616 assembled as contigs, and processed to remove chimeras and erroneous sequences per the  
617 Kozich protocol [103] and mothur MiSeq SOP ([https://mothur.org/wiki/miseq\\_sop/](https://mothur.org/wiki/miseq_sop/) accessed



618 07/16/2020). Sequences were aligned to the Greengenes core reference alignment for  
619 taxonomy using the 2013 release (gg\_13\_8\_99) [104]. Sequences were differentiated into  
620 amplicon sequence variants (ASVs) using the make.shared command, resulting in a total of  
621 8,108,071 sequences. Subsampling was performed using 186,745 sequences, which  
622 corresponded to the smallest sample in our dataset. Diversity measurements were performed  
623 using mothur calculators to estimate community richness (Chao1 estimator), community  
624 evenness (Shannon evenness), and community diversity (inverse Simpson index).

625

### 626 **Decontamination and Read Processing**

627 Metagenomic reads were decontaminated and trimmed as previously described [23] using  
628 BBDuk short read aligner v38.56 [105]. Briefly, raw reads were mapped to the internal Illumina  
629 phage genome control phiX174 (J02482.1), human reference genome (hg38), and potential  
630 laboratory contaminants including mouse genome (mm10), *Enterococcus faecalis* V583  
631 genome (NC\_004668.1), *E. faecalis* OG1RF genome (NC\_017316.1), and *E. faecalis* phage  
632 VPE25 (LT546030.1) using the bbsplit algorithm with default settings. Unmapped reads were  
633 trimmed of adapter sequences, with low quality reads and reads of insufficient length removed  
634 using the bbdup algorithm with the following parameters: ktrim = lr, k = 20, mink = 4, minlength =  
635 20, qtrim = f, as previously described [23].

636

### 637 **Metagenomic Assembly**

638 Decontaminated and trimmed R1 and R2 reads were interleaved using the fq2fa --merge  
639 command from the IDBA-UD package [106]. Whole metagenome and VLP assemblies were  
640 performed using the MEGAHIT assembler v1.2.7 [107] using the default setting plus the  
641 following flags: --presets meta-large (--k-min 27 --k-max 127 --k-step 10) for large and complex  
642 metagenomes.

643

## 644 **Quantitative Read Mapping and Construction of the Curated VLP Contig Database**

645 VLP reads were assembled into 25 individual sample sets, corresponding to the 25 individual  
646 fecal samples included in our study. All contigs resulting from MEGAHIT assembly were filtered  
647 to a minimum length of 5kb, resulting in a pool of 80,762 total contigs from all samples. Three  
648 separate independently published methods were employed to identify putative phages from the  
649 pooled set of contigs over 5kb in length. First, the P/M read mapping approach was used  
650 whereby each sample's VLP and whole metagenome reads were mapped to their  
651 corresponding assembled contigs, using BMap as previously described [23]. After pooling, the  
652 top 100 largest ratios of VLP reads to whole metagenome reads for all 25 read-mapping sets for  
653 each sample were identified and pooled. Redundancy was removed using cd-hit-est at an  
654 identity threshold of 95% resulting in 2117 unique contig sequences. Next, as a separate  
655 method, putative phages from the 80,762 contigs were identified by searching for viral protein  
656 family (VPF) hits, as previously described [41]. Separate filters were applied for VPF hits  
657 calculated in relation to total genes, microbial genes, and percent non-viral Pfams. 2,902 contigs  
658 were identified that contained 5 or more VPF hits and with non-viral Pfam hits below 20%. 263  
659 contigs were identified with 5 or more VPF hits, with more viral gene content than microbial  
660 genes per contig, and 644 contigs were identified with 2 – 4 VPF hits and 0 microbial gene hits.  
661 Finally, 976 contigs were identified with only 1 VPF hit per contig, and were included regardless  
662 of microbial gene content. The third and final independent phage contig identification method  
663 used was VIBRANT v1.2.1 [37], a neural network machine learning algorithm that identifies viral  
664 protein signatures. VIBRANT identified 4,758 unique phage contigs. After combining these three  
665 independent approaches used to identify unique sets of phages, all sets were combined and the  
666 overlapping 660 contigs were used for analysis as the curated contig set. To assess contig  
667 completion and contamination levels, CheckV v0.6.0 was used with standard operating  
668 parameters.

669

## 670 **Differential Abundance Analyses**

671 To calculate differential abundance in pairwise analyses, we first generated read mapping count  
672 matrices by mapping all VLP reads to the curated contig set of 660 contigs. The bbmap  
673 algorithm from the BBMap suite of tools was used with the following parameters: ambiguous =  
674 random, qtrim = lr, minid = 0.97. Total raw read counts were aggregated per contig and  
675 assembled into 25 count matrices for all samples, which were then used as input for DESeq2  
676 v1.20.0 [53] running in R version 3.6.3 for comprehensive differential abundance analysis. Raw  
677 un-normalized read count coverage values were used to compare fold changes across three  
678 pairwise comparisons: CCP+ vs. HC, CCP- vs. HC, and CCP+ vs. CCP- groups. The standard  
679 workflow for differential analysis within DESeq2 was used, producing logarithmic fold-change  
680 values incorporating Wald tests for  $p$ -value calculations and the Benjamini-Hochberg multiple  
681 testing correction for the adjusted  $p$ -value. In total, 178 phage contigs from our set of 660 were  
682 found to be differentially abundant using thresholds of  $\log_2$  Fold Change  $< -1$  or  $> 1$  and  
683 adjusted  $p$ -value  $< 0.001$ .

684

## 685 **VLP Clustering, Phage Host Matching, and AMG Identification**

686 Clustering of all viral contigs within the RA virome described in this study was performed using  
687 two lists of contigs, the total 4,785 viral sequences identified by all filters of the VPF method, as  
688 well as the final curated set of 660 contigs. First, all 4,785 sequences were screened against the  
689 most recent iteration of the public viral database IMG/VR v3.0 [44] using blastn with 95%  
690 sequence similarity over 85% of each 1kb region of the contig, which resulted in 19,892 viral  
691 sequences. Then, a total of 24,926 sequences were screened against each other using blastn  
692 with the same parameters and omitting duplicate hits. Markov clustering of these 9.4 million  
693 connections resulted in a total of 1,193 clusters encompassing 22,306 total sequences. Overall,  
694 2,420 of the 4,785 total RA virome sequences were clustered into 1,184 clusters. Of these  
695 clusters, 41 contained a reference viral isolate, 1,037 contained another metagenomic viral

696 contig from IMG/VR, and 106 were identified as originating from RA metagenomic sequencing  
697 projects. Lastly, clustering was also calculated for the 660 curated viral sequences, which  
698 resulted in 266 individual clusters containing 336 (roughly 48% of curated set) unique  
699 sequences. Phage host assignments were determined via bacterial CRISPR spacer matching  
700 as previously described [23], requiring at least 93% sequence identity match over the entire  
701 spacer length and allowing for up to 2 mismatches. Of our 660 curated contig list, 207 (31.4%)  
702 had CRISPR spacers matching reference isolates therefore leading to host predictions for a  
703 third of our final contigs. VIBRANT v1.2.1 was used to identify auxiliary metabolic genes (AMGs)  
704 according to KEGG metabolic pathway annotations. VIBRANT annotates using VOG, Pfam, and  
705 KEGG databases; therefore, if the best HMM hit is to the KEGG database and also if the  
706 annotation is in a metabolic pathway, the hit gets called as an AMG.

707

## 708 **Data Visualizations**

709 Various R packages were used, including DESeq2, ggplot2, ComplexHeatmap, pheatmap,  
710 corrplot, RColorBrewer, and EnhancedVolcano. Graphpad Prism v8.4.3 was used for all  
711 supplemental calculations. Lastly, SankeyMATIC (<https://github.com/nowthis/sankeymatic>) and  
712 meta-chart (<https://www.meta-chart.com/venn>) were used to create the Sankey and Venn  
713 diagrams depicted in Figure 1, respectively.

714

## 715 **FIGURE LEGENDS**

716 **Figure 1. Generation and curation of *de novo* assembled VLP contigs.** Metagenomic  
717 sequencing was carried out for 25 samples belonging to 3 cohorts of individuals, FDRs at risk  
718 for developing RA later in life with either CCP+ or CCP- serology status, and a Healthy Control  
719 (HC) group. (A) Contigs were assembled *de novo* for all samples, ranging from 30,011 to  
720 284,689 contigs per sample, and a total of 3,557,500 contigs for the entire sample set. Each  
721 node on the Sankey diagram is scaled to the number of contigs it contains. Thresholds of

722 minimum contig sizes being greater than 1 and 5 kilobases reduced the total numbers to  
723 564,228 and 80,762 contigs respective to the size cut-off. Three independent methods were  
724 used to identify putative phages from the list of 80,762 contigs (boxed portion of panel A),  
725 resulting in 2,117 contigs from the P/M ratio method, 4,785 contigs from the Viral Protein  
726 Families method, and 4,758 contigs using the VIBRANT algorithm. (B) A Venn diagram was  
727 created to show the overlap of redundant contigs identified among the three methods. 660  
728 unique contigs were identified independently by all phage identification methods. (C) CheckV  
729 analysis of the three separate methods as well as the final set of curated contigs revealed a  
730 disparity in host contamination, with the set of 660 contigs being relatively free of host bacterial  
731 contamination. Colors were assigned to the CheckV categories that account for prophage  
732 elements based on their position on the contig sequence, as well as pure viral (green) and pure  
733 bacterial (grey) classifications.

734

735 **Figure 2. Clustering with metagenomic viral contigs reveals viral ecological composition.**

736 (A) Host assignments for the set of curated phages based on Markov clustering to the IMG/VR  
737 database metagenomic viral clusters or direct match to bacterial CRISPR spacers, based on  
738 cohort abundance. Bacteroidaceae, Lachnospiraceae, Ruminococcaceae, and  
739 Streptococcaceae hosts are evident to be cumulatively more abundant than other bacterial  
740 families, especially for the CCP+ cohort. (B) Cladogram of the complete host phylogeny at the  
741 genus level for all spacers identified from total RA virome via the VPF method. The pie chart at  
742 the center represents all 958 CRISPR spacers from the family level quantified in panel A that  
743 have been color coordinated on this cladogram as well. Total host hits were quantified at the  
744 genus level and are represented in relative size by colored circles, indicating host assignments  
745 that were discerned via clustering (dark grey) and those that were identified via direct CRISPR  
746 spacer matching (light grey). Total CRISPR spacers per contig with family level host taxonomy

747 assignments were tabulated per cohort group (C) and differentiated as narrow or broad phage  
748 host ranges (D) based on target uniformity to bacterial family.

749

750 **Figure 3. Phage-host assignments for curated VLP contigs reveal cohort-based**  
751 **differential read recruitment among several bacterial families.** Relative abundances were  
752 calculated for all VLP reads mapped to phages predicted to target Bacteroidaceae (A),  
753 Clostridiaceae (B), Lachnospiraceae (C), Ruminococcaceae (D), Streptococcaceae (E), and  
754 Veillonellaceae (F) bacterial families. For these analyses, VLP reads were mapped to predicted  
755 phage contigs to which CRISPR spacers were assigned using bbmap at a 97% minimum read-  
756 mapping identity level. Scaffold abundances were averaged across all samples and statistics  
757 were determined by nonparametric Wilcoxon tests (\*  $p < 0.05$ , \*\*  $p < 0.01$ , \*\*\*\*  $p < 0.0001$ ).

758

759 **Figure 4. CRISPR spacer host metadata reveal CCP+ phages represent greater variability**  
760 **in microbial host ecology.** Phage host isolate ecology metadata was compiled from  
761 JGI/GOLD v7.0 and broken down by Ecosystem, Ecosystem Category, Ecosystem Type, and  
762 Ecosystem Subtype distributions accordingly for all CRISPR spacers identified within our list of  
763 660 phages. (A) Ecosystem Distribution showing the percent host-associated spacers  
764 calculated for each contig based on cohort distribution. (B) Ecosystem Category distribution  
765 showing the percent human-associated spacers. (C) Ecosystem Type distribution showing the  
766 percent of contigs that contain spacers originating from the digestive system. (D) Ecosystem  
767 Subtype showing the percent of contigs that contain spacers originating from the large intestine  
768 microenvironment. Cohort distributions based on these metadata revealed a disproportionate  
769 distribution of CRISPR spacers among samples originating from CCP+ individuals when  
770 compared to CCP- or HC groups. Statistical significance was determined using pairwise  
771 Wilcoxon rank sum tests for comparisons between the three groups, using the Benjamini-  
772 Hochberg correction for multiple testing comparisons (\*  $p = 0.023$ , \*\*\*\*  $p < 2 \times 10^{-16}$ ).

773

774 **Figure 5. Quantitative read mapping exposes differentially abundant contigs despite**  
775 **sample cohesiveness.** Quantitative read mapping of all VLP read sets to the final curated 660  
776 phages reveals contig-contig dissimilarities despite minimal sample-sample variance or intra-  
777 sample hierarchical clustering. Differential abundance calculations were carried out within the  
778 DESeq2 package by way of 3 pairwise comparisons: CCP+ vs. HC, CCP- vs. HC, and CCP+  
779 vs. CCP-. (A, B, C) Analyses of the first and second principal components for sample-to-sample  
780 exploratory analyses revealed minimal variance explained across all comparisons. (D, E, F)  
781 Euclidian distances for sample-sample read-based coverages were used for hierarchical  
782 clustering across all pairwise comparisons reveal minimal clustering based on sample type. (G,  
783 H, I) Volcano plots reveal 9%, 10%, and 8% of contigs included in our analysis are differentially  
784 abundant respective to CCP+ vs. HC, CCP- vs. HC, and CCP+ vs. CCP- group-based  
785 comparisons of specific contig community members.

786

787 **Figure 6. Phage auxiliary metabolic gene abundances highlight cohort-associated**  
788 **disparities in potential metabolic function.** AMGs were identified within the VIBRANT  
789 algorithm, based on screening 2,835 auxiliary metabolic genes with KEGG Orthology  
790 annotations (March 2019 KEGG release, [ftp://ftp.genome.jp/pub/db/kofam/archives/2019-03-](ftp://ftp.genome.jp/pub/db/kofam/archives/2019-03-20/)  
791 [20/](ftp://ftp.genome.jp/pub/db/kofam/archives/2019-03-20/)). (A) Total counts per KEGG Pathway were used normalize relative abundance of AMGs per  
792 sample, which were clustered using the ComplexHeatmap package in R. Areas in black indicate  
793 no AMG hits were present for the entire cohort for the 660 contig samples. (B) Differentially  
794 abundant contig for the CCP+ to HC pairwise comparison, visualizing only the contigs which  
795 had CRISPR spacer-predicted hosts. Color-coded stars belong to a list of AMGs and indicate  
796 association with the contig they are adjacent to. (C) Differentially abundant contigs for the CCP-  
797 vs HC comparison.

798

799 **TABLES**

800 **Table 1. Summary of the Subjects' Characteristics for the Samples Included in the Study**

| VARIABLE         | HC   | CCP+ | CCP- |
|------------------|------|------|------|
| Count            | 9    | 8    | 8    |
| Age (mean)       | 44.4 | 61.3 | 49   |
| Age (SD)         | 13.6 | 11   | 15.7 |
| Sex (% female)   | 66.7 | 88.9 | 62.5 |
| Serum CCP+ (%)   | 0    | 100  | 0    |
| Ever smokers (%) | 22.2 | 33.3 | 0    |

801

802 **SUPPLEMENTAL INFORMATION**

803 **Figure S1. Overview of methods for VLP isolation and phage identification from**

804 **sequencing reads.** (A) Individual stool samples were homogenized and split into P and M  
805 subsamples for generating VLP and whole metagenome DNA, respectively. (B) Total  
806 sequencing reads generated per sample for each P and M read sets, after quality control and  
807 decontamination. (C) Total assembled contigs with length greater than 5kb generated per  
808 sample for each P and M read sets. (D) Overview of the computational pipeline used to identify  
809 phages; from short-insert pair end read sets averaging approximately 75M read pairs per  
810 sample, to the 80,762 *de novo* assembled contigs greater than 5kb in length, and the three  
811 independent methods for phage identification (P/M, VPF, VIBRANT).

812

813 **Figure S2. Estimation of contig completeness by CheckV.** Distribution of contig lengths

814 across contig quality categories according to the MIUViG standards. Contigs derived from the  
815 (A) P/M ratio method of phage identification, (B) the VPF method, (C) VIBRANT algorithm, and  
816 finally (D) the curated contig list. Boxplots depict the following five summary statistics: median,  
817 lower and upper hinges corresponding to the first and third quartiles, and two whiskers  
818 corresponding to 1.5 times the interquartile range between the first and third quartiles. Points  
819 beyond the whiskers correspond to outlier points.

820



821 **Figure S3. Lifestyle and morphology distributions of curated phage contigs.** (A) Total  
822 contigs per sample among the three groups, divided according to infection mechanism (lytic vs.  
823 lysogenic) as determined by the VIBRANT algorithm. (B) Relative abundances of phage  
824 lifestyles as determined by the VIBRANT algorithm. In total, for our 660 predicted phages, 467  
825 (70.8%) are classified as lytic and 193 (29.2%) are classified as lysogenic by VIBRANT. (C)  
826 Viral taxonomy of all contigs per sample including the top four morphotypes: Siphoviridae,  
827 Myoviridae, Podoviridae, and Microviridae. (D) Relative abundance of all viral morphotypes  
828 identified for all 660 phages. Viral taxonomy was determined using a custom database  
829 described in this preprint by Kieft et al. (2020; bioRxiv preprint doi:  
830 <https://doi.org/10.1101/2020.08.24.253096>).

831  
832 **Figure S4. Clustering distribution of singletons and viral groups.** (A) Total singletons, viral  
833 contigs that did not cluster with any other genome, per sample and RA cohort group. (B)  
834 Distribution of total viral clusters in relation to the number of viral genomes clustered within each  
835 group.

836  
837 **Figure S5. CRISPR spacer host metadata distribution of environmental and engineered**  
838 **derived phages per cohort.** Phage host isolate ecology metadata was compiled from  
839 JGI/GOLD v7.0 at the highest Ecosystem classification level for all CRISPR spacers identified  
840 within our list of 660 phages. Data is presented as percent of spacers per contig whose  
841 metadata is designated as originating from (A) environmental or (B) engineered environments,  
842 distributed across the three RA cohort groups. Statistical significance was determined using  
843 pairwise Wilcoxon rank sum tests for comparisons between the three groups, using the  
844 Benjamini-Hochberg correction for multiple testing comparisons (\*  $p = 0.011$ , \*\*\*\*  $p < 2 \times 10^{-16}$ ).

845

846 **Figure S6. Principal component analyses based on quality, predicted phage lifestyle, and**  
847 **sample cohort.** Principal components for the final curated set of 660 contigs derived from the  
848 VIBRANT phage identification program categorized by (A) contig quality, (B) phage lifestyle, and  
849 (C) cohort group. Total identified open reading frames were incorporated in analyses in (A) and  
850 (B), showing a greater dispersion of smaller sized contigs and a consensus grouping of bigger  
851 contigs.

852

853 **Figure S7. Analysis of bacterial family diversity from fecal samples based on 16S**  
854 **sequencing and analyzed using mothur.** (A) Relative abundances of bacterial families based  
855 on ASV binning reveals a significant difference in Lachnospiraceae bacteria originating from  
856 CCP+ fecal DNA samples. Unpaired nonparametric Mann-Whitney tests were used to compare  
857 ranks, revealing  $p$  values of 0.0464 comparing CCP+ to HC individuals. Community richness  
858 was measured by the standard observed richness calculator in mothur (B) as well as the Chao1  
859 richness estimate (C). Community evenness was measured using the Shannon index (D), and  
860 community diversity was measured using the inverse Simpson index (E). No statistically  
861 significant differences were observed among any of the above calculators using nonparametric  
862 tests of significance among the three groups.

863

864 **Figure S8. Distribution of auxiliary metabolic genes found on curated contigs.** (A) A total  
865 of 252 AMGs were discovered among our 660 phages, distributed across the three cohorts. (B)  
866 AMGs were categorized predominantly as belonging to amino acid and cofactor/vitamin  
867 metabolism categories.

868

## 869 **ACKNOWLEDGEMENTS**

870 The authors thank all participants in the SERA studies at the University of Colorado and  
871 elsewhere. We thank Rodolphe Barrangou for comments and suggestions to improve this

872 manuscript. We thank Monica Ransom and Katrina Diener from the University of Colorado  
873 Anschutz Medical Campus Genomics and Microarray Core for performing Illumina library  
874 preparation and sequencing. The following funding sources supported this work: NIH  
875 U01AI101981 (V.M.H., K.A.K.), NIH U01AI130830 (B.A.D.), startup funds from the University of  
876 Colorado School of Medicine (B.A.D.), NIH Research Training in Rheumatology T32AR007534  
877 (M.R.M.), Rheumatology Research Foundation Future Scientist Award (M.E.C.).

878

### 879 **AUTHOR CONTRIBUTIONS**

880 Conceptualization, M.R.M, D.P., A.C., K.A.K., and B.A.D.; Methodology, M.R.M., D.P., K.K.,  
881 A.C., J.A.S., M.L.F., M.K.D., and B.A.D.; Investigation, M.R.M, D.P., K.K., A.C., M.E.C.; Sample  
882 Procurement, M.E.C., J.A.S., M.L.F., and M.K.D.; Visualization, M.R.M, D.P. and K.K.; Writing –  
883 Original Draft, M.R.M and B.A.D.; Writing – Review & Editing, M.R.M, D.P., K.K., A.C., M.E.C,  
884 A.S., K.D.D., V.M.H., K.A.K. and B.A.D.; Funding Acquisition, V.M.H. and B.A.D.; Resources,  
885 B.A.D.; Supervision, B.A.D., V.M.H., K.D.D., K.A., A.S. and K.A.K.

886

### 887 **DECLARATION OF INTERESTS**

888 D.P.E is an employee of Mammoth Biosciences and co-founder/employee of Ancilia  
889 Therapeutics. A.S. is the founder/employee of Ancilia Therapeutics. B.A.D. is a co-founder and  
890 shareholder of Ancilia Therapeutics.

891

### 892 **REFERENCES**

893 1. Holers VM, Demoruelle MK, Kuhn KA, Buckner JH, Robinson WH, Okamoto Y, Norris  
894 JM, Deane KD. Rheumatoid arthritis and the mucosal origins hypothesis: protection turns to  
895 destruction. *Nat Rev Rheumatol.* 2018;14(9):542-57.

- 896 2. MacGregor AJ, Snieder H, Rigby AS, Koskenvuo M, Kaprio J, Aho K, Silman AJ.  
897 Characterizing the quantitative genetic contribution to rheumatoid arthritis using data from twins.  
898 *Arthritis Rheum.* 2000;43(1):30-7.
- 899 3. Deane KD, Demoruelle MK, Kelmenson LB, Kuhn KA, Norris JM, Holers VM. Genetic  
900 and environmental risk factors for rheumatoid arthritis. *Best Pract Res Clin Rheumatol.*  
901 2017;31(1):3-18.
- 902 4. Chang HH, Liu GY, Dwivedi N, Sun B, Okamoto Y, Kinslow JD, Deane KD, Demoruelle  
903 MK, Norris JM, Thompson PR, Sparks JA, Rao DA, Karlson EW, Hung HC, Holers VM, Ho IC. A  
904 molecular signature of preclinical rheumatoid arthritis triggered by dysregulated PTPN22. *JCI*  
905 *Insight.* 2016;1(17):e90045.
- 906 5. Demoruelle MK. Mucosa biology and the development of rheumatoid arthritis: potential  
907 for prevention by targeting mucosal processes. *Clin Ther.* 2019;41(7):1270-8.
- 908 6. Demoruelle MK, Bowers E, Lahey LJ, Sokolove J, Purmalek M, Seto NL, Weisman MH,  
909 Norris JM, Kaplan MJ, Holers VM, Robinson WH, Deane KD. Antibody responses to citrullinated  
910 and noncitrullinated antigens in the sputum of subjects with rheumatoid arthritis and subjects at  
911 risk for development of rheumatoid arthritis. *Arthritis Rheumatol.* 2018;70(4):516-27.
- 912 7. Demoruelle MK, Harrall KK, Ho L, Purmalek MM, Seto NL, Rothfuss HM, Weisman MH,  
913 Solomon JJ, Fischer A, Okamoto Y, Kelmenson LB, Parish MC, Feser M, Fleischer C, Anderson  
914 C, Mahler M, Norris JM, Kaplan MJ, Cherrington BD, Holers VM, Deane KD. Anti-citrullinated  
915 protein antibodies are associated with neutrophil extracellular traps in the sputum in relatives of  
916 rheumatoid arthritis patients. *Arthritis Rheumatol.* 2017;69(6):1165-75.
- 917 8. Hughes-Austin JM, Deane KD, Derber LA, Kolfenbach JR, Zerbe GO, Sokolove J, Lahey  
918 LJ, Weisman MH, Buckner JH, Mikuls TR, O'Dell JR, Keating RM, Gregersen PK, Robinson

- 919 WH, Holers VM, Norris JM. Multiple cytokines and chemokines are associated with rheumatoid  
920 arthritis-related autoimmunity in first-degree relatives without rheumatoid arthritis: Studies of the  
921 Aetiology of Rheumatoid Arthritis (SERA). *Ann Rheum Dis*. 2013;72(6):901-7.
- 922 9. Willis VC, Demoruelle MK, Derber LA, Chartier-Logan CJ, Parish MC, Pedraza IF,  
923 Weisman MH, Norris JM, Holers VM, Deane KD. Sputum autoantibodies in patients with  
924 established rheumatoid arthritis and subjects at risk of future clinically apparent disease.  
925 *Arthritis Rheum*. 2013;65(10):2545-54.
- 926 10. Brusca SB, Abramson SB, Scher JU. Microbiome and mucosal inflammation as extra-  
927 articular triggers for rheumatoid arthritis and autoimmunity. *Curr Opin Rheumatol*.  
928 2014;26(1):101-7.
- 929 11. Scher JU, Sczesnak A, Longman RS, Segata N, Ubeda C, Bielski C, Rostron T,  
930 Cerundolo V, Pamer EG, Abramson SB, Huttenhower C, Littman DR. Expansion of intestinal  
931 *Prevotella copri* correlates with enhanced susceptibility to arthritis. *Elife*. 2013;2:e01202.
- 932 12. Maeda Y, Kurakawa T, Umemoto E, Motooka D, Ito Y, Gotoh K, Hirota K, Matsushita M,  
933 Furuta Y, Narazaki M, Sakaguchi N, Kayama H, Nakamura S, Iida T, Saeki Y, Kumanogoh A,  
934 Sakaguchi S, Takeda K. Dysbiosis contributes to arthritis development via activation of  
935 autoreactive T cells in the intestine. *Arthritis Rheumatol*. 2016;68(11):2646-61.
- 936 13. Zhang X, Zhang D, Jia H, Feng Q, Wang D, Liang D, Wu X, Li J, Tang L, Li Y, Lan Z,  
937 Chen B, Li Y, Zhong H, Xie H, Jie Z, Chen W, Tang S, Xu X, Wang X, Cai X, Liu S, Xia Y, Li J,  
938 Qiao X, Al-Aama JY, Chen H, Wang L, Wu QJ, Zhang F, Zheng W, Li Y, Zhang M, Luo G, Xue  
939 W, Xiao L, Li J, Chen W, Xu X, Yin Y, Yang H, Wang J, Kristiansen K, Liu L, Li T, Huang Q, Li  
940 Y, Wang J. The oral and gut microbiomes are perturbed in rheumatoid arthritis and partly  
941 normalized after treatment. *Nat Med*. 2015;21(8):895-905.

- 942 14. Vaahntovu J, Munukka E, Korkeamaki M, Luukkainen R, Toivanen P. Fecal microbiota  
943 in early rheumatoid arthritis. *J Rheumatol.* 2008;35(8):1500-5.
- 944 15. Toivanen P, Vartiainen S, Jalava J, Luukkainen R, Mottonen T, Eerola E, Manninen R.  
945 Intestinal anaerobic bacteria in early rheumatoid arthritis (RA). *Arthritis Research & Therapy.*  
946 2002;4.
- 947 16. Alpizar-Rodriguez D, Lesker TR, Gronow A, Gilbert B, Raemy E, Lamacchia C, Gabay  
948 C, Finckh A, Strowig T. *Prevotella copri* in individuals at risk for rheumatoid arthritis. *Ann Rheum*  
949 *Dis.* 2019;78(5):590-3.
- 950 17. Pianta A, Arvikar S, Strle K, Drouin EE, Wang Q, Costello CE, Steere AC. Evidence of  
951 the immune relevance of *Prevotella copri*, a gut microbe, in patients with rheumatoid arthritis.  
952 *Arthritis Rheumatol.* 2017;69(5):964-75.
- 953 18. Drago L. *Prevotella copri* and microbiota in rheumatoid arthritis: fully convincing  
954 evidence? *J Clin Med.* 2019;8(11).
- 955 19. Duerkop BA. Bacteriophages shift the focus of the mammalian microbiota. *PLoS Pathog.*  
956 2018;14(10):e1007310.
- 957 20. Minot S, Sinha R, Chen J, Li H, Keilbaugh SA, Wu GD, Lewis JD, Bushman FD. The  
958 human gut virome: inter-individual variation and dynamic response to diet. *Genome Res.*  
959 2011;21(10):1616-25.
- 960 21. Manrique P, Bolduc B, Walk ST, van der Oost J, de Vos WM, Young MJ. Healthy human  
961 gut phageome. *Proc Natl Acad Sci U S A.* 2016;113(37):10400-5.
- 962 22. Shkoporov AN, Hill C. Bacteriophages of the human gut: the "known unknown" of the  
963 microbiome. *Cell Host Microbe.* 2019;25(2):195-209.

- 964 23. Duerkop BA, Kleiner M, Paez-Espino D, Zhu W, Bushnell B, Hassell B, Winter SE,  
965 Kyrpides NC, Hooper LV. Murine colitis reveals a disease-associated bacteriophage community.  
966 Nat Microbiol. 2018;3(9):1023-31.
- 967 24. Clooney AG, Sutton TDS, Shkoporov AN, Holohan RK, Daly KM, O'Regan O, Ryan FJ,  
968 Draper LA, Plevy SE, Ross RP, Hill C. Whole-virome analysis sheds light on viral dark matter in  
969 inflammatory bowel disease. Cell Host Microbe. 2019;26(6):764-78 e5.
- 970 25. Khan Mirzaei M, Khan MAA, Ghosh P, Taranu ZE, Taguer M, Ru J, Chowdhury R, Kabir  
971 MM, Deng L, Mondal D, Maurice CF. Bacteriophages isolated from stunted children can  
972 regulate gut bacterial communities in an age-specific manner. Cell Host Microbe.  
973 2020;27(2):199-212 e5.
- 974 26. Zhao G, Vatanen T, Droit L, Park A, Kostic AD, Poon TW, Vlamakis H, Siljander H,  
975 Harkonen T, Hamalainen AM, Peet A, Tillmann V, Ilonen J, Wang D, Knip M, Xavier RJ, Virgin  
976 HW. Intestinal virome changes precede autoimmunity in type I diabetes-susceptible children.  
977 Proc Natl Acad Sci U S A. 2017;114(30):E6166-E75.
- 978 27. Barr JJ, Auro R, Furlan M, Whiteson KL, Erb ML, Pogliano J, Stotland A, Wolkowicz R,  
979 Cutting AS, Doran KS, Salamon P, Youle M, Rohwer F. Bacteriophage adhering to mucus  
980 provide a non-host-derived immunity. Proc Natl Acad Sci U S A. 2013;110(26):10771-6.
- 981 28. Quistad SD, Grasis JA, Barr JJ, Rohwer FL. Viruses and the origin of microbiome  
982 selection and immunity. ISME J. 2017;11(4):835-40.
- 983 29. Gorski A, Dabrowska K, Miedzybrodzki R, Weber-Dabrowska B, Lusiak-Szelachowska  
984 M, Jonczyk-Matysiak E, Borysowski J. Phages and immunomodulation. Future Microbiol.  
985 2017;12:905-14.

- 986 30. Minot SS, Willis AD. Clustering co-abundant genes identifies components of the gut  
987 microbiome that are reproducibly associated with colorectal cancer and inflammatory bowel  
988 disease. *Microbiome*. 2019;7(1):110.
- 989 31. Yu AI, Zhao L, Eaton KA, Ho S, Chen J, Poe S, Becker J, Gonzalez A, McKinstry D,  
990 Hasso M, Mendoza-Castrejon J, Whitfield J, Koumpouras C, Schloss PD, Martens EC, Chen  
991 GY. Gut microbiota modulate CD8 T cell responses to influence colitis-associated  
992 tumorigenesis. *Cell Rep*. 2020;31(1):107471.
- 993 32. Norman JM, Handley SA, Baldrige MT, Droit L, Liu CY, Keller BC, Kambal A, Monaco  
994 CL, Zhao G, Fleshner P, Stappenbeck TS, McGovern DP, Keshavarzian A, Mutlu EA, Sauk J,  
995 Gevers D, Xavier RJ, Wang D, Parkes M, Virgin HW. Disease-specific alterations in the enteric  
996 virome in inflammatory bowel disease. *Cell*. 2015;160(3):447-60.
- 997 33. Gevers D, Kugathasan S, Denson LA, Vazquez-Baeza Y, Van Treuren W, Ren B,  
998 Schwager E, Knights D, Song SJ, Yassour M, Morgan XC, Kostic AD, Luo C, Gonzalez A,  
999 McDonald D, Haberman Y, Walters T, Baker S, Rosh J, Stephens M, Heyman M, Markowitz J,  
1000 Baldassano R, Griffiths A, Sylvester F, Mack D, Kim S, Crandall W, Hyams J, Huttenhower C,  
1001 Knight R, Xavier RJ. The treatment-naive microbiome in new-onset Crohn's disease. *Cell Host  
1002 Microbe*. 2014;15(3):382-92.
- 1003 34. Lee JY, Manna M, Kim Y, Kim J, Kim GT, Seo YS. Comparative analysis of fecal  
1004 microbiota composition between rheumatoid arthritis and osteoarthritis patients. *Genes (Basel)*.  
1005 2019;10(10).
- 1006 35. Van Belleghem JD, Dabrowska K, Vaneechoutte M, Barr JJ, Bollyky PL. Interactions  
1007 between bacteriophage, bacteria, and the mammalian immune system. *Viruses*. 2018;11(1).



- 1008 36. Rodriguez-Valera F, Martin-Cuadrado AB, Rodriguez-Brito B, Pasic L, Thingstad TF,  
1009 Rohwer F, Mira A. Explaining microbial population genomics through phage predation. *Nat Rev*  
1010 *Microbiol.* 2009;7(11):828-36.
- 1011 37. Kieft K, Zhou Z, Anantharaman K. VIBRANT: automated recovery, annotation and  
1012 curation of microbial viruses, and evaluation of viral community function from genomic  
1013 sequences. *Microbiome.* 2020;8(1):90.
- 1014 38. Kolfenbach JR, Deane KD, Derber LA, O'Donnell C, Weisman MH, Buckner JH, Gersuk  
1015 VH, Wei S, Mikuls TR, O'Dell J, Gregersen PK, Keating RM, Norris JM, Holers VM. A  
1016 prospective approach to investigating the natural history of preclinical rheumatoid arthritis (RA)  
1017 using first-degree relatives of probands with RA. *Arthritis Rheum.* 2009;61(12):1735-42.
- 1018 39. Demoruelle MK, Parish MC, Derber LA, Kolfenbach JR, Hughes-Austin JM, Weisman  
1019 MH, Gilliland W, Edison JD, Buckner JH, Mikuls TR, O'Dell JR, Keating RM, Gregersen PK,  
1020 Norris JM, Holers VM, Deane KD. Performance of anti-cyclic citrullinated peptide assays differs  
1021 in subjects at increased risk of rheumatoid arthritis and subjects with established disease.  
1022 *Arthritis Rheum.* 2013;65(9):2243-52.
- 1023 40. Kang DW, Adams JB, Gregory AC, Borody T, Chittick L, Fasano A, Khoruts A, Geis E,  
1024 Maldonado J, McDonough-Means S, Pollard EL, Roux S, Sadowsky MJ, Lipson KS, Sullivan  
1025 MB, Caporaso JG, Krajmalnik-Brown R. Microbiota Transfer Therapy alters gut ecosystem and  
1026 improves gastrointestinal and autism symptoms: an open-label study. *Microbiome.*  
1027 2017;5(1):10.
- 1028 41. Paez-Espino D, Pavlopoulos GA, Ivanova NN, Kyrpides NC. Nontargeted virus  
1029 sequence discovery pipeline and virus clustering for metagenomic data. *Nat Protoc.*  
1030 2017;12(8):1673-82.

- 1031 42. Nayfach S, Camargo AP, Eloë-Fadrosh E, Roux S, Kyrpides N. CheckV: assessing the  
1032 quality of metagenome-assembled viral genomes. bioRxiv preprint. 2020.
- 1033 43. Roux S, Adriaenssens EM, Dutilh BE, Koonin EV, Kropinski AM, Krupovic M, Kuhn JH,  
1034 Lavigne R, Brister JR, Varsani A, Amid C, Aziz RK, Bordenstein SR, Bork P, Breitbart M,  
1035 Cochrane GR, Daly RA, Desnues C, Duhaime MB, Emerson JB, Enault F, Fuhrman JA,  
1036 Hingamp P, Hugenholtz P, Hurwitz BL, Ivanova NN, Labonte JM, Lee KB, Malmstrom RR,  
1037 Martinez-Garcia M, Mizrachi IK, Ogata H, Paez-Espino D, Petit MA, Putonti C, Rattei T, Reyes  
1038 A, Rodriguez-Valera F, Rosario K, Schriml L, Schulz F, Steward GF, Sullivan MB, Sunagawa S,  
1039 Suttle CA, Temperton B, Tringe SG, Thurber RV, Webster NS, Whiteson KL, Wilhelm SW,  
1040 Wommack KE, Woyke T, Wrighton KC, Yilmaz P, Yoshida T, Young MJ, Yutin N, Allen LZ,  
1041 Kyrpides NC, Eloë-Fadrosh EA. Minimum Information about an Uncultivated Virus Genome  
1042 (MIUViG). *Nat Biotechnol.* 2019;37(1):29-37.
- 1043 44. Roux S, Paez-Espino D, Chen IA, Palaniappan K, Ratner A, Chu K, Reddy TBK,  
1044 Nayfach S, Schulz F, Call L, Neches RY, Woyke T, Ivanova NN, Eloë-Fadrosh EA, Kyrpides  
1045 NC. IMG/VR v3: an integrated ecological and evolutionary framework for interrogating genomes  
1046 of uncultivated viruses. *Nucleic Acids Res.* 2020.
- 1047 45. Barrangou R, Fremaux C, Deveau H, Richards M, Boyaval P, Moineau S, Romero DA,  
1048 Horvath P. CRISPR provides acquired resistance against viruses in prokaryotes. *Science.*  
1049 2007;315(5819):1709-12.
- 1050 46. Stern A, Mick E, Tirosh I, Sagy O, Sorek R. CRISPR targeting reveals a reservoir of  
1051 common phages associated with the human gut microbiome. *Genome Res.* 2012;22(10):1985-  
1052 94.

- 1053 47. Paez-Espino D, Eloë-Fadrosh EA, Pavlopoulos GA, Thomas AD, Huntemann M,  
1054 Mikhailova N, Rubin E, Ivanova NN, Kyrpides NC. Uncovering Earth's virome. *Nature*.  
1055 2016;536(7617):425-30.
- 1056 48. Moreno-Gallego JL, Chou SP, Di Rienzi SC, Goodrich JK, Spector TD, Bell JT,  
1057 Youngblut ND, Hewson I, Reyes A, Ley RE. Virome diversity correlates with intestinal  
1058 microbiome diversity in adult monozygotic twins. *Cell Host Microbe*. 2019;25(2):261-72 e5.
- 1059 49. Roux S, Emerson JB, Eloë-Fadrosh EA, Sullivan MB. Benchmarking viromics: an in  
1060 silico evaluation of metagenome-enabled estimates of viral community composition and  
1061 diversity. *PeerJ*. 2017;5:e3817.
- 1062 50. Liang G, Zhao C, Zhang H, Mattei L, Sherrill-Mix S, Bittinger K, Kessler LR, Wu GD,  
1063 Baldassano RN, DeRusso P, Ford E, Elovitz MA, Kelly MS, Patel MZ, Mazhani T, Gerber JS,  
1064 Kelly A, Zemel BS, Bushman FD. The stepwise assembly of the neonatal virome is modulated  
1065 by breastfeeding. *Nature*. 2020;581(7809):470-4.
- 1066 51. Mukherjee S, Stamatis D, Bertsch J, Ovchinnikova G, Katta HY, Mojica A, Chen IA,  
1067 Kyrpides NC, Reddy T. Genomes OnLine database (GOLD) v.7: updates and new features.  
1068 *Nucleic Acids Res*. 2019;47(D1):D649-D59.
- 1069 52. Nayfach S, Roux S, Seshadri R, Udwarý D, Varghese N, Schulz F, Wu D, Paez-Espino  
1070 D, Chen IM, Huntemann M, Palaniappan K, Ladau J, Mukherjee S, Reddy TBK, Nielsen T,  
1071 Kirton E, Faria JP, Edirisinghe JN, Henry CS, Jungbluth SP, Chivian D, Dehal P, Wood-  
1072 Charlson EM, Arkin AP, Tringe SG, Visel A, Consortium IMD, Woyke T, Mouncey NJ, Ivanova  
1073 NN, Kyrpides NC, Eloë-Fadrosh EA. A genomic catalog of Earth's microbiomes. *Nat Biotechnol*.  
1074 2020.

- 1075 53. Love MI, Huber W, Anders S. Moderated estimation of fold change and dispersion for  
1076 RNA-seq data with DESeq2. *Genome Biol.* 2014;15(12):550.
- 1077 54. Breitbart M, Thompson LR, Suttle CA, Sullivan MB. Exploring the vast diversity of marine  
1078 viruses. *Oceanography.* 2007;20(2):135-9.
- 1079 55. Thompson LR, Zeng Q, Kelly L, Huang KH, Singer AU, Stubbe J, Chisholm SW. Phage  
1080 auxiliary metabolic genes and the redirection of cyanobacterial host carbon metabolism. *Proc*  
1081 *Natl Acad Sci U S A.* 2011;108(39):E757-64.
- 1082 56. Breitbart M, Bonnain C, Malki K, Sawaya NA. Phage puppet masters of the marine  
1083 microbial realm. *Nat Microbiol.* 2018;3(7):754-66.
- 1084 57. Reyes A, Haynes M, Hanson N, Angly FE, Heath AC, Rohwer F, Gordon JI. Viruses in  
1085 the faecal microbiota of monozygotic twins and their mothers. *Nature.* 2010;466(7304):334-8.
- 1086 58. Chevallereau A, Blasdel BG, De Smet J, Monot M, Zimmermann M, Kogadeeva M,  
1087 Sauer U, Jorth P, Whiteley M, Debarbieux L, Lavigne R. Next-generation "-omics" approaches  
1088 reveal a massive alteration of host RNA metabolism during bacteriophage infection of  
1089 *Pseudomonas aeruginosa*. *PLoS Genet.* 2016;12(7):e1006134.
- 1090 59. De Smet J, Zimmermann M, Kogadeeva M, Ceysens PJ, Vermaelen W, Blasdel B, Bin  
1091 Jang H, Sauer U, Lavigne R. High coverage metabolomics analysis reveals phage-specific  
1092 alterations to *Pseudomonas aeruginosa* physiology during infection. *ISME J.* 2016;10(8):1823-  
1093 35.
- 1094 60. Chatterjee A, Willett JLE, Nguyen UT, Monogue B, Palmer KL, Dunny GM, Duerkop BA.  
1095 Parallel Genomics Uncover Novel Enterococcal-Bacteriophage Interactions. *mBio.* 2020;11(2).

- 1096 61. Howard-Varona C, Lindback MM, Bastien GE, Solonenko N, Zayed AA, Jang H,  
1097 Andreopoulos B, Brewer HM, Glavina Del Rio T, Adkins JN, Paul S, Sullivan MB, Duhaime MB.  
1098 Phage-specific metabolic reprogramming of virocells. *ISME J.* 2020;14(4):881-95.
- 1099 62. Valvano MA, Messner P, Kosma P. Novel pathways for biosynthesis of nucleotide-  
1100 activated glycerol-manno-heptose precursors of bacterial glycoproteins and cell surface  
1101 polysaccharides. *Microbiology (Reading).* 2002;148(Pt 7):1979-89.
- 1102 63. Nakao R, Senpuku H, Watanabe H. *Porphyromonas gingivalis galE* is involved in  
1103 lipopolysaccharide O-antigen synthesis and biofilm formation. *Infect Immun.* 2006;74(11):6145-  
1104 53.
- 1105 64. Crummett LT, Puxty RJ, Weihe C, Marston MF, Martiny JBH. The genomic content and  
1106 context of auxiliary metabolic genes in marine cyanomyoviruses. *Virology.* 2016;499:219-29.
- 1107 65. Lopez-Perez M, Haro-Moreno JM, de la Torre JR, Rodriguez-Valera F. Novel  
1108 caudovirales associated with marine group I Thaumarchaeota assembled from metagenomes.  
1109 *Environ Microbiol.* 2019;21(6):1980-8.
- 1110 66. Ignacio-Espinoza JC, Sullivan MB. Phylogenomics of T4 cyanophages: lateral gene  
1111 transfer in the 'core' and origins of host genes. *Environ Microbiol.* 2012;14(8):2113-26.
- 1112 67. Breitbart M. Marine viruses: truth or dare. *Ann Rev Mar Sci.* 2012;4:425-48.
- 1113 68. Markenson JA. Worldwide trends in the socioeconomic impact and long-term prognosis  
1114 of rheumatoid arthritis. *Semin Arthritis Rheum.* 1991;21(2 Suppl 1):4-12.
- 1115 69. Hunter TM, Boytsov NN, Zhang X, Schroeder K, Michaud K, Araujo AB. Prevalence of  
1116 rheumatoid arthritis in the United States adult population in healthcare claims databases, 2004-  
1117 2014. *Rheumatol Int.* 2017;37(9):1551-7.

- 1118 70. Scher JU, Abramson SB. The microbiome and rheumatoid arthritis. *Nat Rev Rheumatol.*  
1119 2011;7(10):569-78.
- 1120 71. Mirzaei MK, Maurice CF. Menage a trois in the human gut: interactions between host,  
1121 bacteria and phages. *Nat Rev Microbiol.* 2017;15(7):397-408.
- 1122 72. Bin Jang H, Bolduc B, Zablocki O, Kuhn JH, Roux S, Adriaenssens EM, Brister JR,  
1123 Kropinski AM, Krupovic M, Lavigne R, Turner D, Sullivan MB. Taxonomic assignment of  
1124 uncultivated prokaryotic virus genomes is enabled by gene-sharing networks. *Nat Biotechnol.*  
1125 2019;37(6):632-9.
- 1126 73. Sutton TDS, Hill C. Gut bacteriophage: current understanding and challenges. *Front*  
1127 *Endocrinol (Lausanne).* 2019;10:784.
- 1128 74. Roux S, Hallam SJ, Woyke T, Sullivan MB. Viral dark matter and virus-host interactions  
1129 resolved from publicly available microbial genomes. *Elife.* 2015;4.
- 1130 75. Liu X, Zeng B, Zhang J, Li W, Mou F, Wang H, Zou Q, Zhong B, Wu L, Wei H, Fang Y.  
1131 Role of the gut microbiome in modulating arthritis progression in mice. *Sci Rep.* 2016;6:30594.
- 1132 76. Jubair WK, Hendrickson JD, Severs EL, Schulz HM, Adhikari S, Ir D, Pagan JD, Anthony  
1133 RM, Robertson CE, Frank DN, Banda NK, Kuhn KA. Modulation of inflammatory arthritis in mice  
1134 by gut microbiota through mucosal inflammation and autoantibody generation. *Arthritis*  
1135 *Rheumatol.* 2018;70(8):1220-33.
- 1136 77. Braschi E, Shojanian K, Allan GM. Anti-CCP: a truly helpful rheumatoid arthritis test? *Can*  
1137 *Fam Physician.* 2016;62(3):234.

- 1138 78. Krych L, Nielsen DS, Hansen AK, Hansen CH. Gut microbial markers are associated  
1139 with diabetes onset, regulatory imbalance, and IFN-gamma level in NOD mice. *Gut Microbes*.  
1140 2015;6(2):101-9.
- 1141 79. Chriswell ME, Kuhn KA. Microbiota-mediated mucosal inflammation in arthritis. *Best*  
1142 *Pract Res Clin Rheumatol*. 2019;33(6):101492.
- 1143 80. Studer N, Desharnais L, Beutler M, Brugiroux S, Terrazos MA, Menin L, Schurch CM,  
1144 McCoy KD, Kuehne SA, Minton NP, Stecher B, Bernier-Latmani R, Hapfelmeier S. Functional  
1145 intestinal bile acid 7 $\alpha$ -dehydroxylation by *Clostridium scindens* associated with protection  
1146 from *Clostridium difficile* infection in a gnotobiotic mouse model. *Front Cell Infect Microbiol*.  
1147 2016;6:191.
- 1148 81. Buffie CG, Bucci V, Stein RR, McKenney PT, Ling L, Gobourne A, No D, Liu H,  
1149 Kinnebrew M, Viale A, Littmann E, van den Brink MR, Jenq RR, Taur Y, Sander C, Cross JR,  
1150 Toussaint NC, Xavier JB, Pamer EG. Precision microbiome reconstitution restores bile acid  
1151 mediated resistance to *Clostridium difficile*. *Nature*. 2015;517(7533):205-8.
- 1152 82. Duboc H, Rajca S, Rainteau D, Benarous D, Maubert MA, Quervain E, Thomas G,  
1153 Barbu V, Humbert L, Despras G, Bridonneau C, Dumetz F, Grill JP, Masliah J, Beaugerie L,  
1154 Cosnes J, Chazouilleres O, Poupon R, Wolf C, Mallet JM, Langella P, Trugnan G, Sokol H,  
1155 Seksik P. Connecting dysbiosis, bile-acid dysmetabolism and gut inflammation in inflammatory  
1156 bowel diseases. *Gut*. 2013;62(4):531-9.
- 1157 83. Atarashi K, Tanoue T, Oshima K, Suda W, Nagano Y, Nishikawa H, Fukuda S, Saito T,  
1158 Narushima S, Hase K, Kim S, Fritz JV, Wilmes P, Ueha S, Matsushima K, Ohno H, Olle B,  
1159 Sakaguchi S, Taniguchi T, Morita H, Hattori M, Honda K. Treg induction by a rationally selected  
1160 mixture of Clostridia strains from the human microbiota. *Nature*. 2013;500(7461):232-6.

- 1161 84. Gerard P. Metabolism of cholesterol and bile acids by the gut microbiota. *Pathogens*.  
1162 2013;3(1):14-24.
- 1163 85. Yao L, Seaton SC, Ndousse-Fetter S, Adhikari AA, DiBenedetto N, Mina AI, Banks AS,  
1164 Bry L, Devlin AS. A selective gut bacterial bile salt hydrolase alters host metabolism. *Elife*.  
1165 2018;7.
- 1166 86. Campbell DE, Ly LK, Ridlon JM, Hsiao A, Whitaker RJ, Degan PH. Infection with  
1167 *Bacteroides* phage BV01 alters the host transcriptome and bile acid metabolism in a common  
1168 human gut microbe. *Cell Rep*. 2020;32(11):108142.
- 1169 87. Lozupone CA, Stombaugh JI, Gordon JI, Jansson JK, Knight R. Diversity, stability and  
1170 resilience of the human gut microbiota. *Nature*. 2012;489(7415):220-30.
- 1171 88. Zhu W, Winter MG, Byndloss MX, Spiga L, Duerkop BA, Hughes ER, Buttner L, de Lima  
1172 Romao E, Behrendt CL, Lopez CA, Sifuentes-Dominguez L, Huff-Hardy K, Wilson RP, Gillis CC,  
1173 Tukel C, Koh AY, Burstein E, Hooper LV, Baumler AJ, Winter SE. Precision editing of the gut  
1174 microbiota ameliorates colitis. *Nature*. 2018;553(7687):208-11.
- 1175 89. He SM, Wathier M, Podzelinska K, Wong M, McSorley FR, Asfaw A, Hove-Jensen B, Jia  
1176 Z, Zechel DL. Structure and mechanism of PhnP, a phosphodiesterase of the carbon-  
1177 phosphorus lyase pathway. *Biochemistry*. 2011;50(40):8603-15.
- 1178 90. Martinez A, Ventouras LA, Wilson ST, Karl DM, DeLong EF. Metatranscriptomic and  
1179 functional metagenomic analysis of methylphosphonate utilization by marine bacteria. *Front*  
1180 *Microbiol*. 2013;4:340.
- 1181 91. Lee KS, Metcalf WW, Wanner BL. Evidence for two phosphonate degradative pathways  
1182 in *Enterobacter aerogenes*. *J Bacteriol*. 1992;174(8):2501-10.



- 1183 92. Artacho A, Isaac S, Nayak R, Flor-Duro A, Alexander M, Koo I, Manasson J, Smith PB,  
1184 Rosenthal P, Homsy Y, Gulko P, Pons J, Puchades-Carrasco L, Izmirly P, Patterson A,  
1185 Abramson SB, Pineda-Lucena A, Turnbaugh PJ, Ubeda C, Scher JU. The pre-treatment gut  
1186 microbiome is associated with lack of response to methotrexate in new onset rheumatoid  
1187 arthritis. *Arthritis Rheumatol.* 2020.
- 1188 93. Hsu BB, Gibson TE, Yeliseyev V, Liu Q, Lyon L, Bry L, Silver PA, Gerber GK. Dynamic  
1189 modulation of the gut microbiota and metabolome by bacteriophages in a mouse model. *Cell*  
1190 *Host Microbe.* 2019;25(6):803-14 e5.
- 1191 94. Kuller LH, Mackey RH, Walitt BT, Deane KD, Holers VM, Robinson WH, Sokolove J,  
1192 Chang Y, Liu S, Parks CG, Wright NC, Moreland LW. Determinants of mortality among  
1193 postmenopausal women in the women's health initiative who report rheumatoid arthritis. *Arthritis*  
1194 *Rheumatol.* 2014;66(3):497-507.
- 1195 95. Choi S, Lee KH. Clinical management of seronegative and seropositive rheumatoid  
1196 arthritis: A comparative study. *PLoS One.* 2018;13(4):e0195550.
- 1197 96. Chatterjee A, Duerkop BA. Beyond bacteria: bacteriophage-eukaryotic host interactions  
1198 reveal emerging paradigms of health and disease. *Front Microbiol.* 2018;9:1394.
- 1199 97. Ayyappan P, Harms RZ, Seifert JA, Bemis EA, Feser ML, Deane KD, Demoruelle MK,  
1200 Mikuls TR, Holers VM, Sarvetnick NE. Heightened levels of antimicrobial response factors in  
1201 patients with rheumatoid arthritis. *Front Immunol.* 2020;11:427.
- 1202 98. Kleiner M, Hooper LV, Duerkop BA. Evaluation of methods to purify virus-like particles  
1203 for metagenomic sequencing of intestinal viromes. *BMC Genomics.* 2015;16:7.

- 1204 99. Duerkop BA, Huo W, Bhardwaj P, Palmer KL, Hooper LV. Molecular basis for lytic  
1205 bacteriophage resistance in Enterococci. *mBio*. 2016;7(4).
- 1206 100. Caporaso JG, Lauber CL, Walters WA, Berg-Lyons D, Lozupone CA, Turnbaugh PJ,  
1207 Fierer N, Knight R. Global patterns of 16S rRNA diversity at a depth of millions of sequences  
1208 per sample. *Proc Natl Acad Sci U S A*. 2011;108 Suppl 1:4516-22.
- 1209 101. Dowd SE, Sun Y, Wolcott RD, Domingo A, Carroll JA. Bacterial tag-encoded FLX  
1210 amplicon pyrosequencing (bTEFAP) for microbiome studies: bacterial diversity in the ileum of  
1211 newly weaned *Salmonella*-infected pigs. *Foodborne Pathog Dis*. 2008;5(4):459-72.
- 1212 102. Schloss PD, Westcott SL, Ryabin T, Hall JR, Hartmann M, Hollister EB, Lesniewski RA,  
1213 Oakley BB, Parks DH, Robinson CJ, Sahl JW, Stres B, Thallinger GG, Van Horn DJ, Weber CF.  
1214 Introducing mothur: open-source, platform-independent, community-supported software for  
1215 describing and comparing microbial communities. *Appl Environ Microbiol*. 2009;75(23):7537-41.
- 1216 103. Kozich JJ, Westcott SL, Baxter NT, Highlander SK, Schloss PD. Development of a dual-  
1217 index sequencing strategy and curation pipeline for analyzing amplicon sequence data on the  
1218 MiSeq Illumina sequencing platform. *Appl Environ Microbiol*. 2013;79(17):5112-20.
- 1219 104. DeSantis TZ, Hugenholtz P, Larsen N, Rojas M, Brodie EL, Keller K, Huber T, Dalevi D,  
1220 Hu P, Andersen GL. Greengenes, a chimera-checked 16S rRNA gene database and workbench  
1221 compatible with ARB. *Appl Environ Microbiol*. 2006;72(7):5069-72.
- 1222 105. Bushnell B. BBMap short read aligner, and other bioinformatic tools. 38.56 ed.  
1223 <https://sourceforge.net/projects/bbmap/2019>.
- 1224 106. Peng Y, Leung HC, Yiu SM, Chin FY. IDBA-UD: a de novo assembler for single-cell and  
1225 metagenomic sequencing data with highly uneven depth. *Bioinformatics*. 2012;28(11):1420-8.

- 1226 107. Li D, Luo R, Liu CM, Leung CM, Ting HF, Sadakane K, Yamashita H, Lam TW.  
1227 MEGAHIT v1.0: A fast and scalable metagenome assembler driven by advanced methodologies  
1228 and community practices. *Methods*. 2016;102:3-11.  
1229

**Figure 1****A**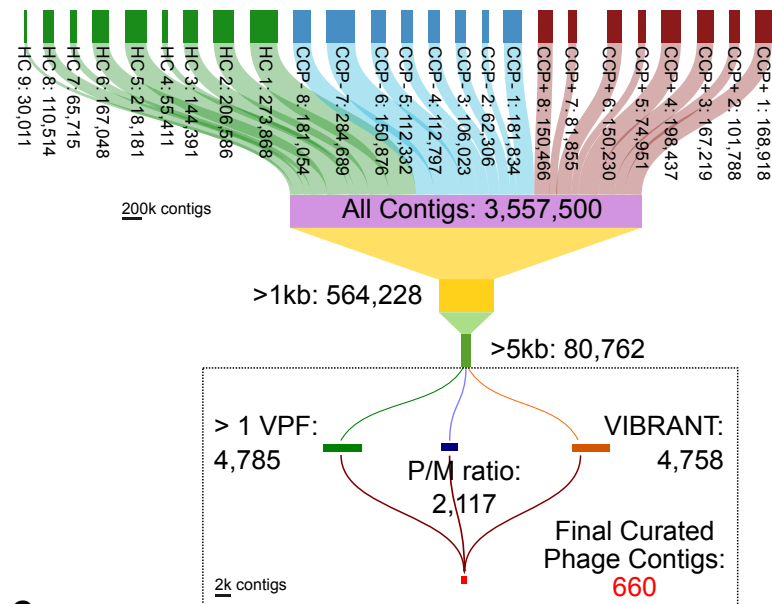**B**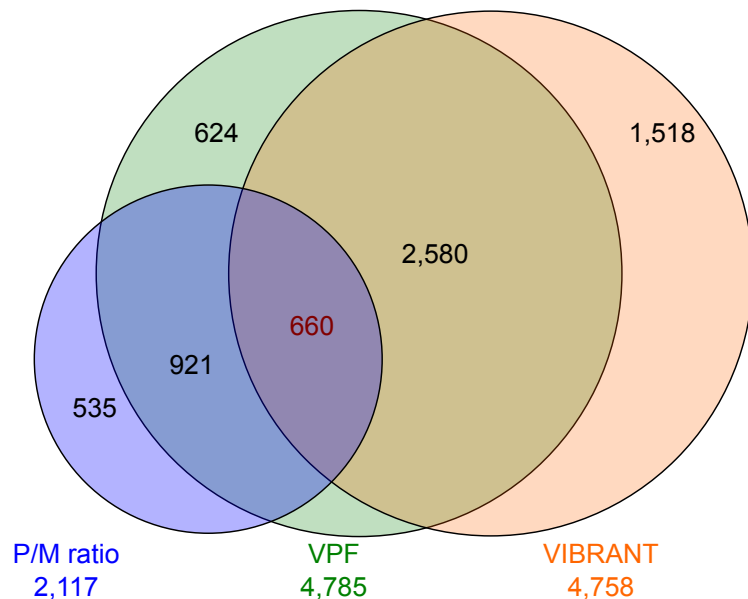**C**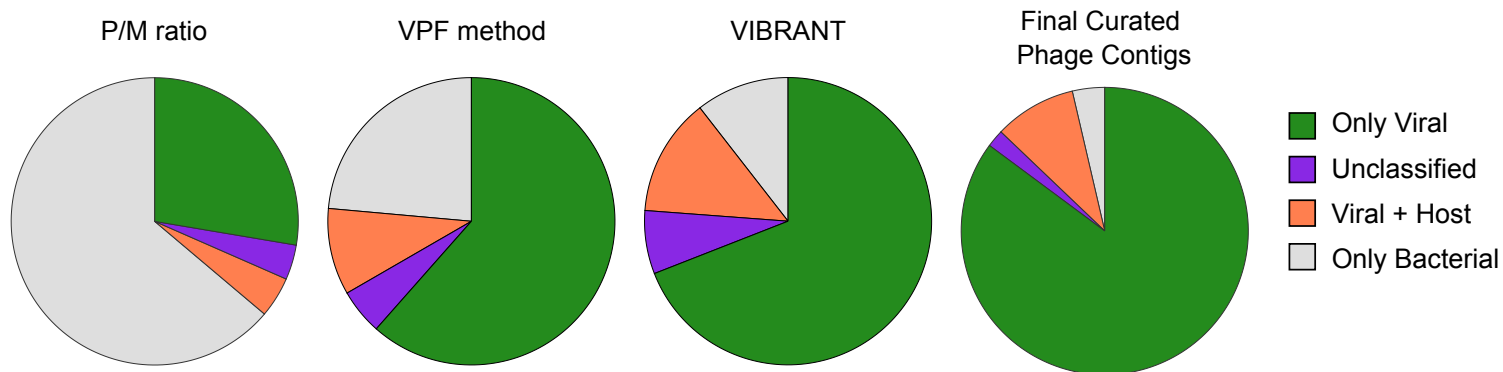

**Figure 2**

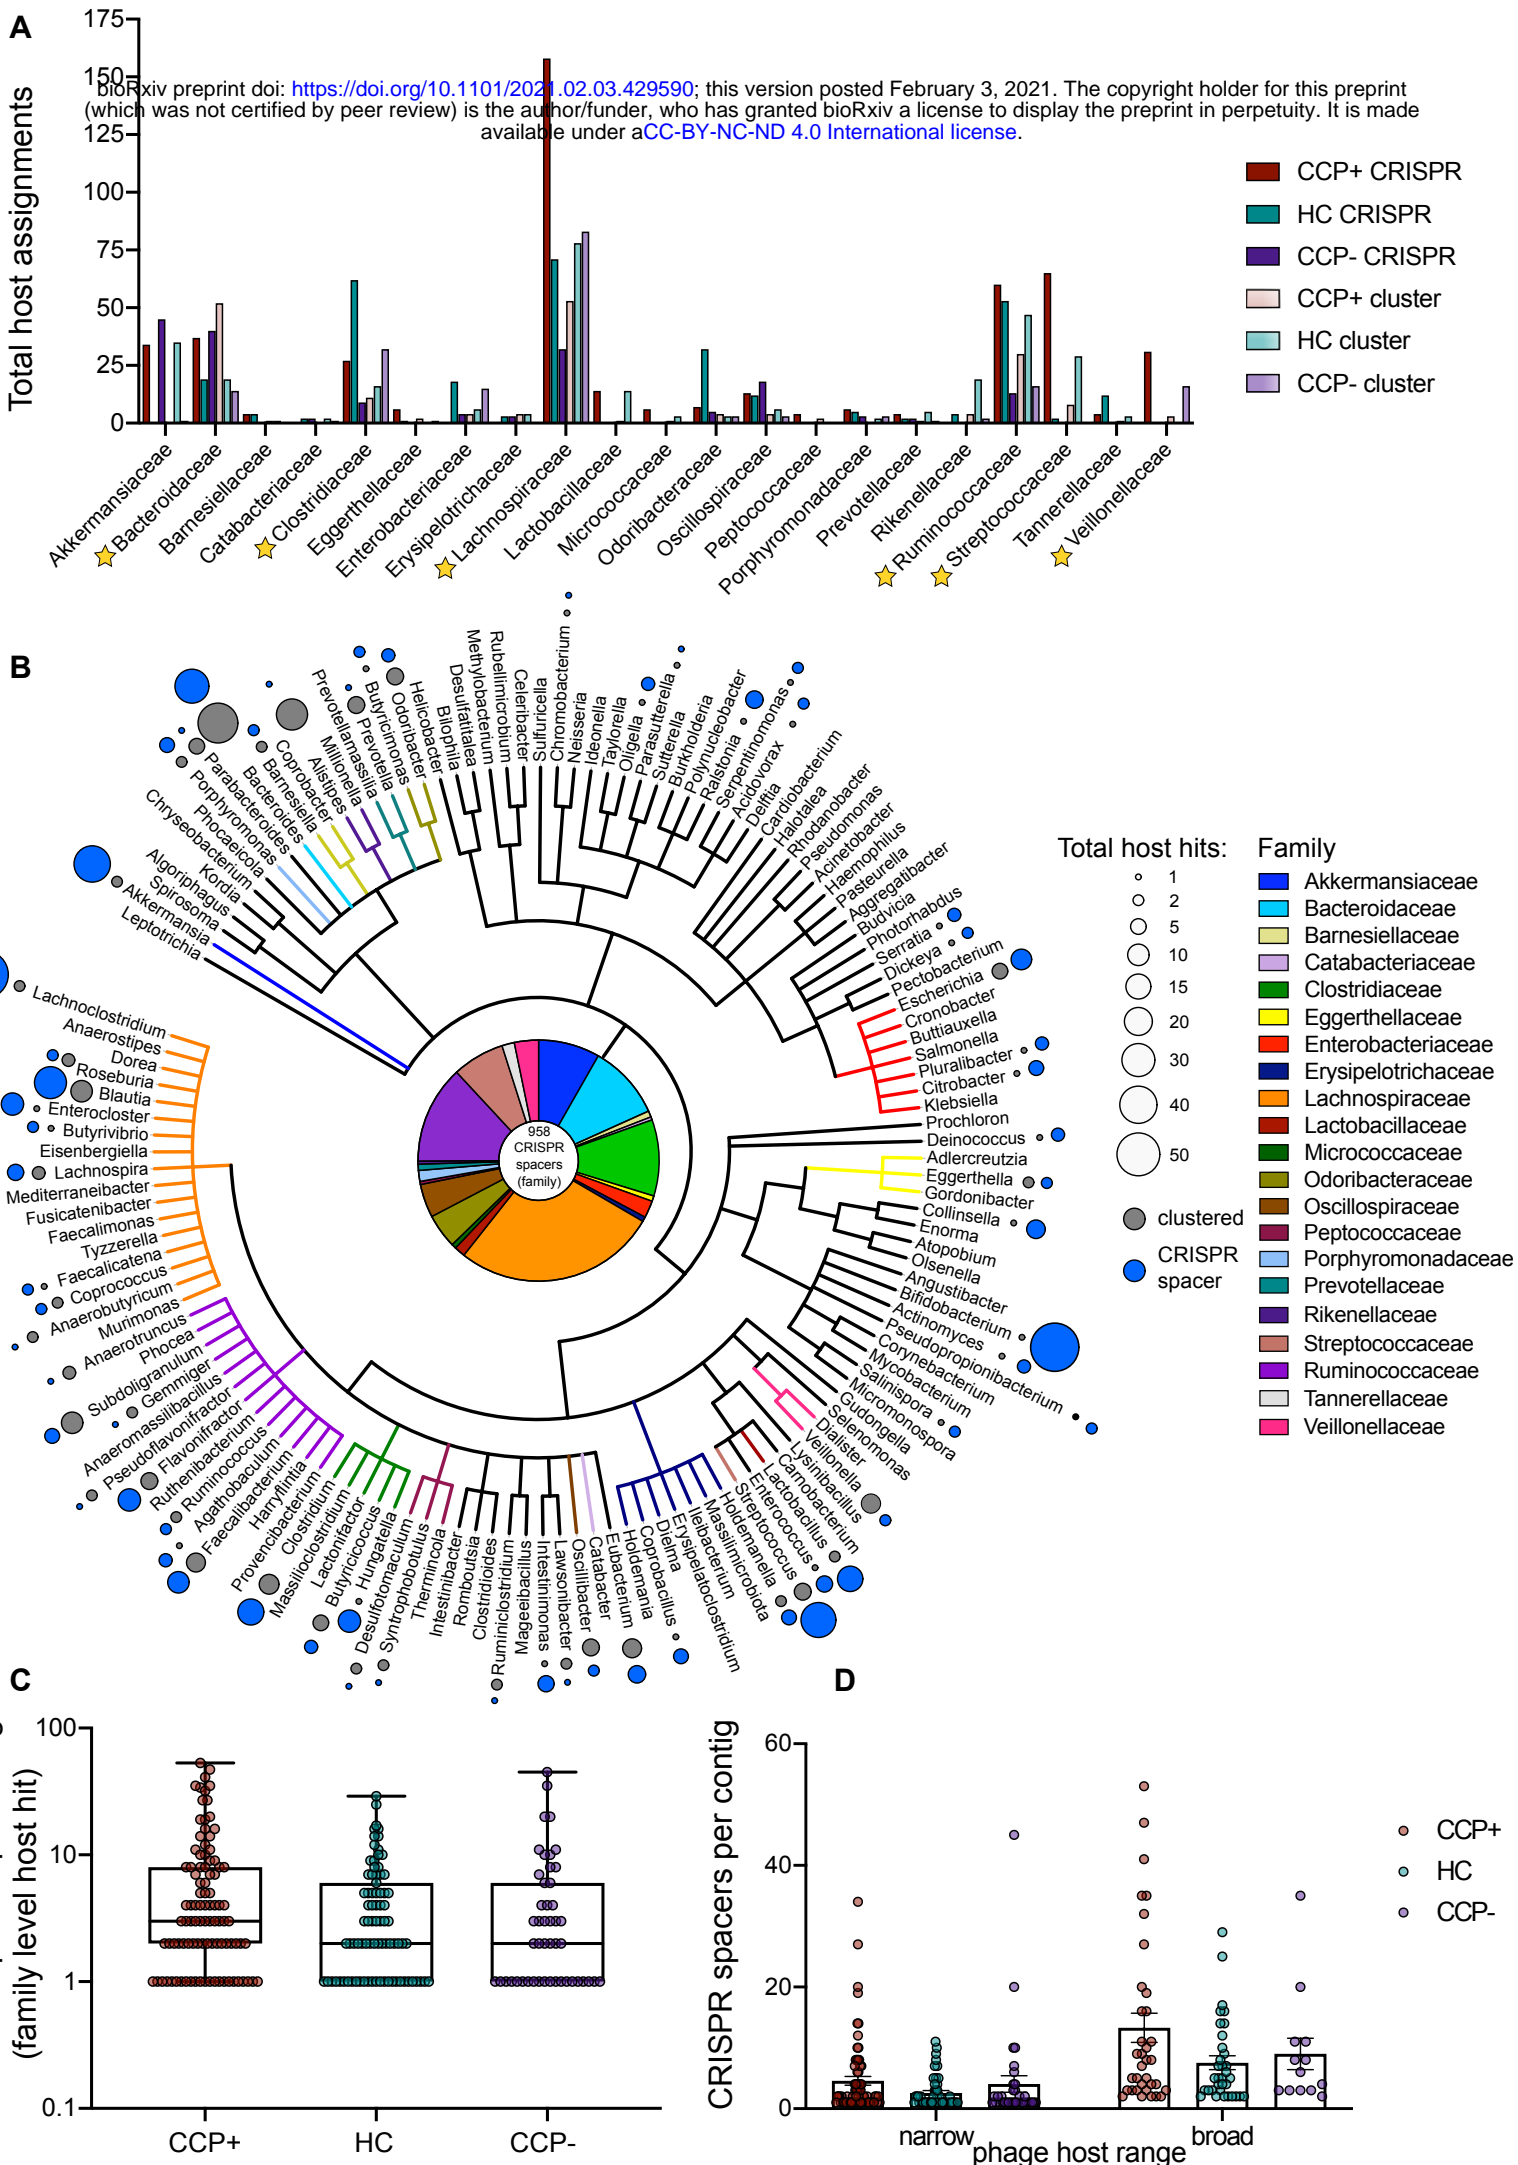

**Figure 3**

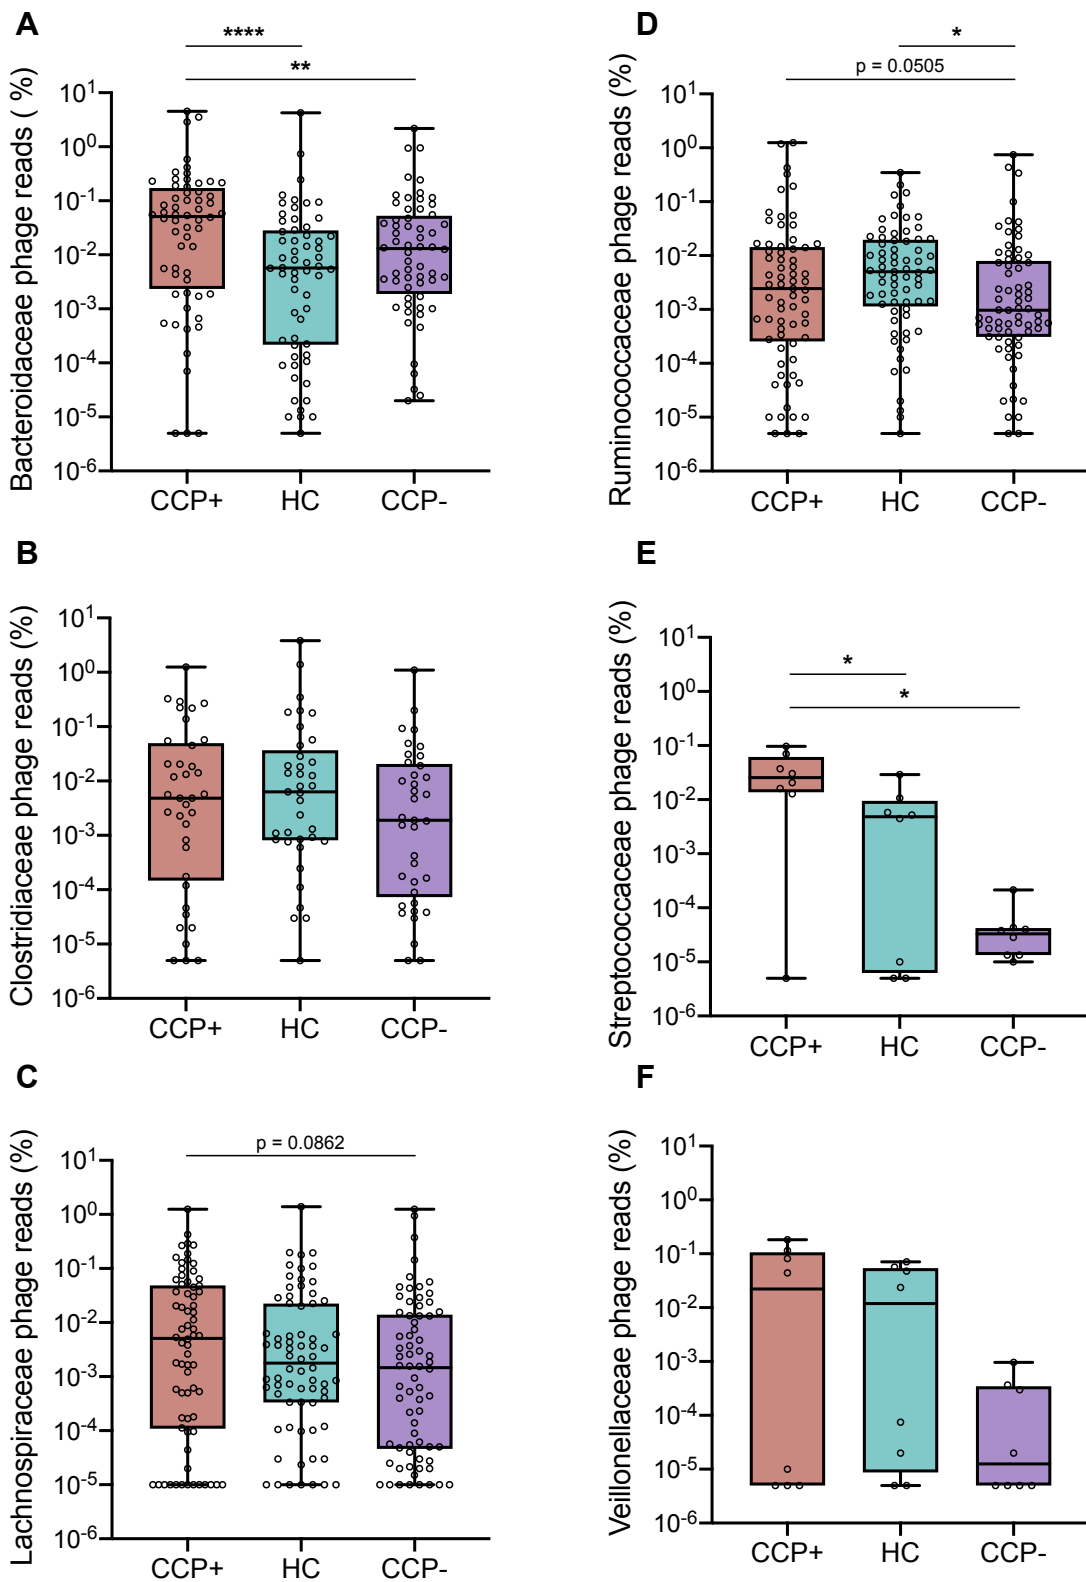

Figure 4

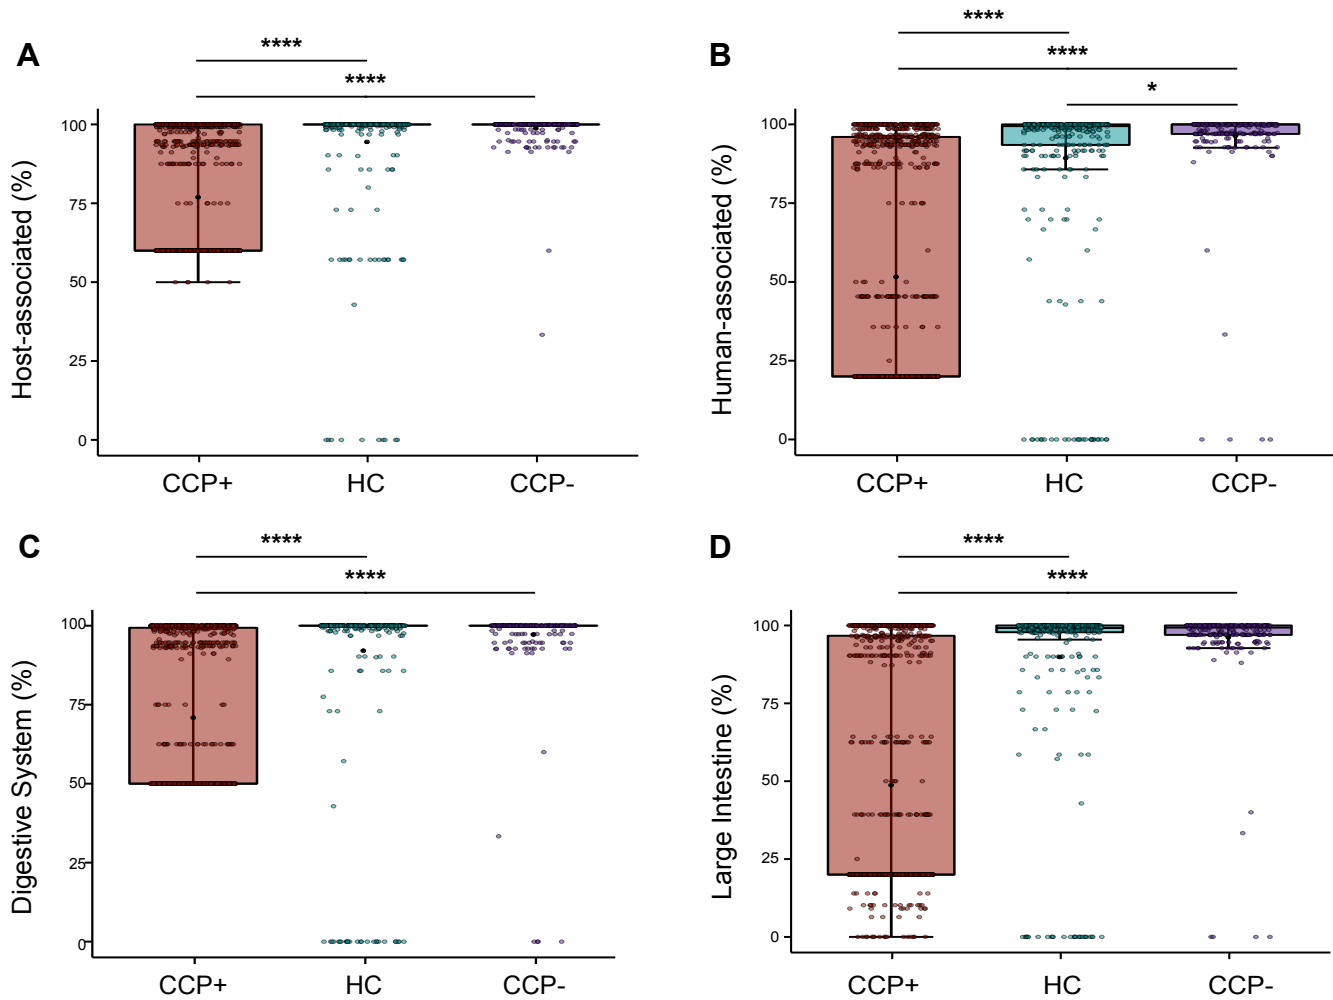

**Figure 5**

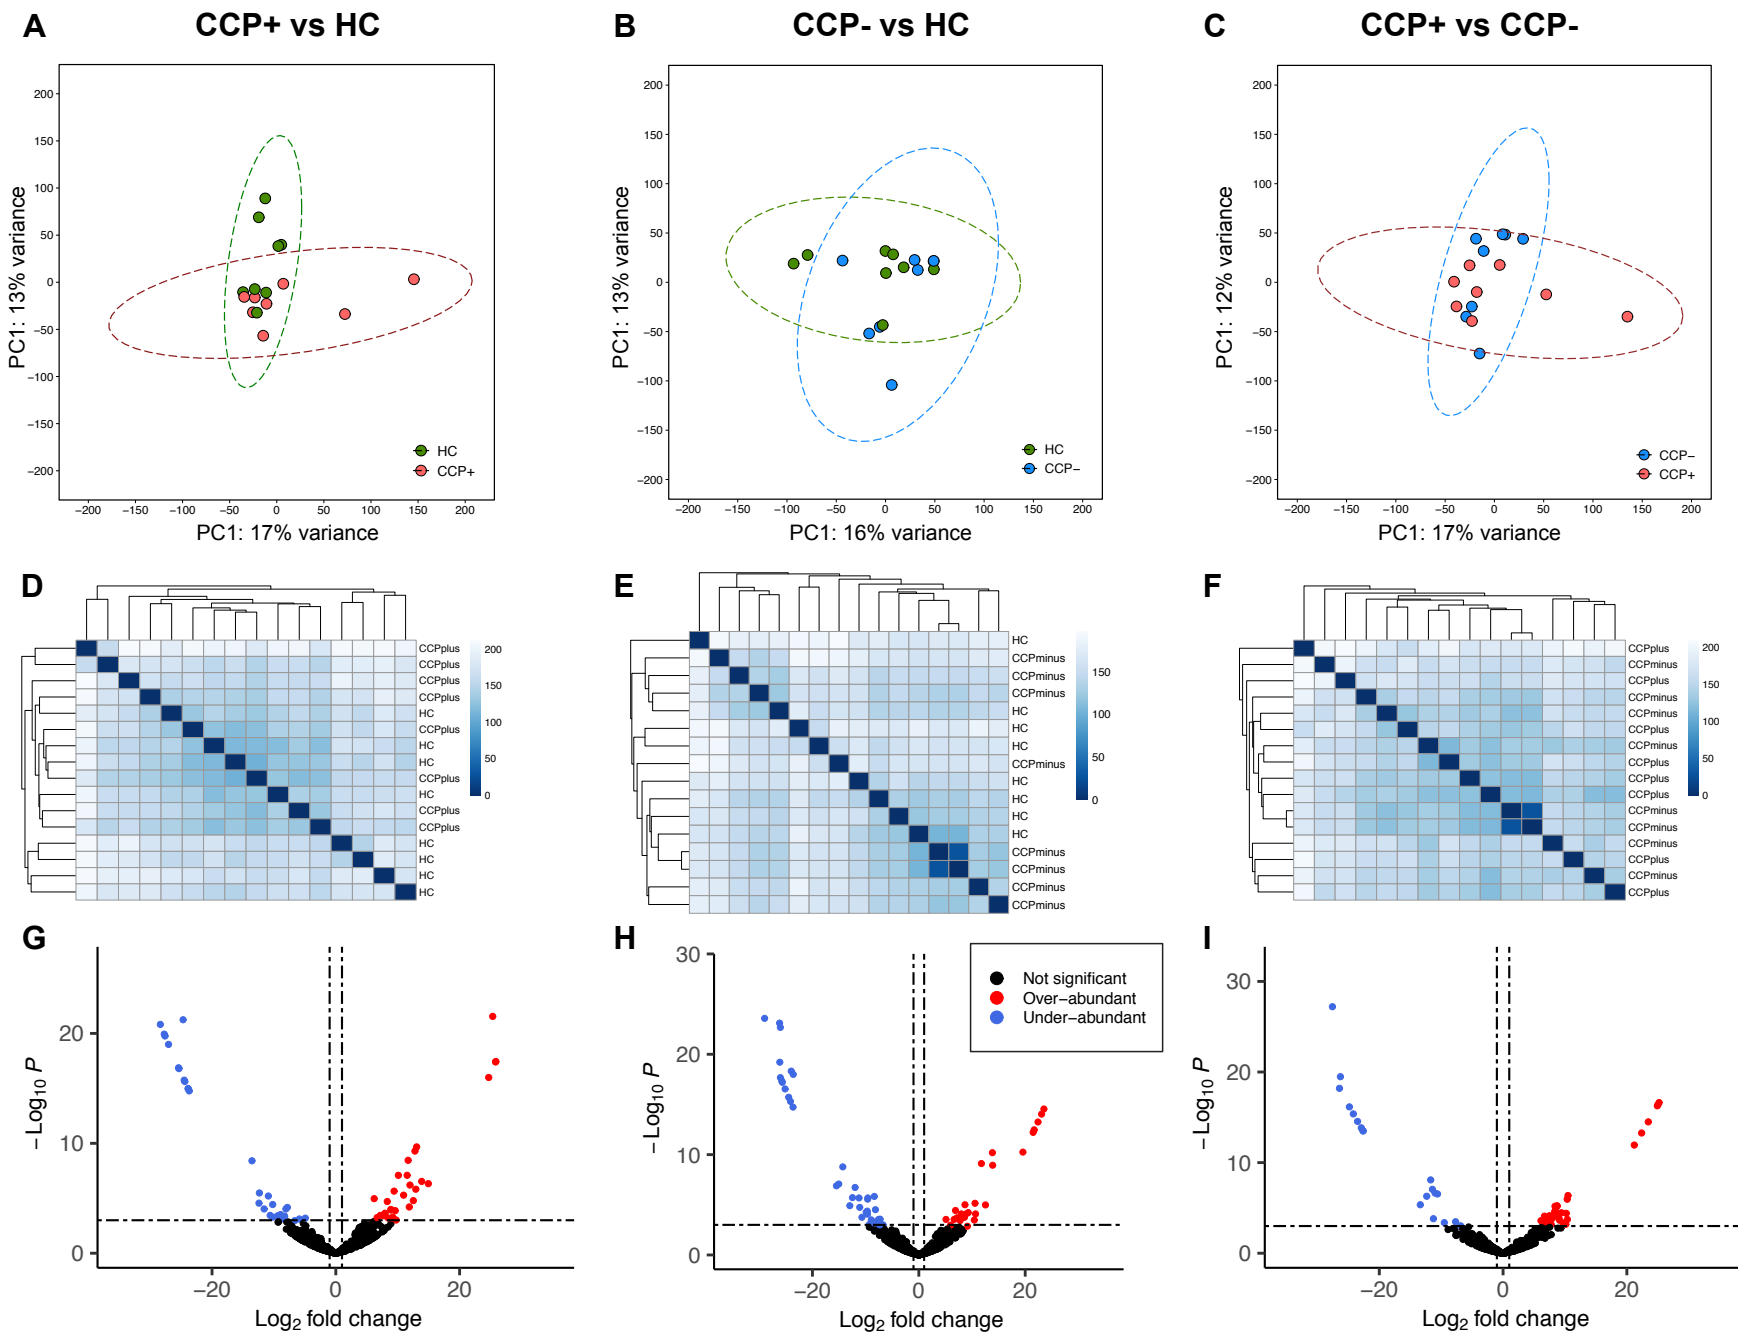



**Figure 6**

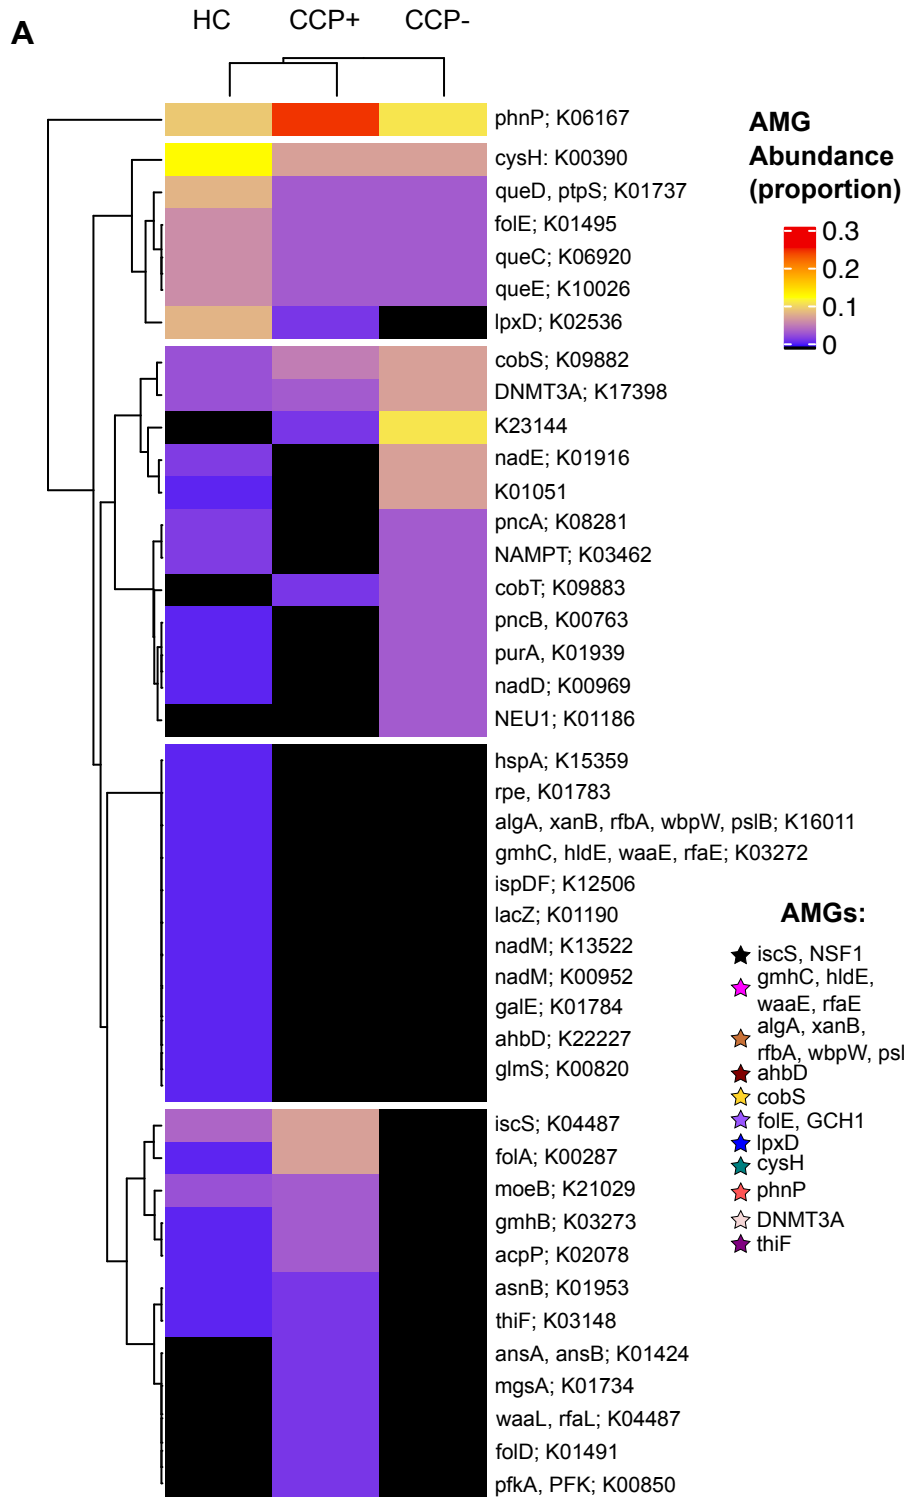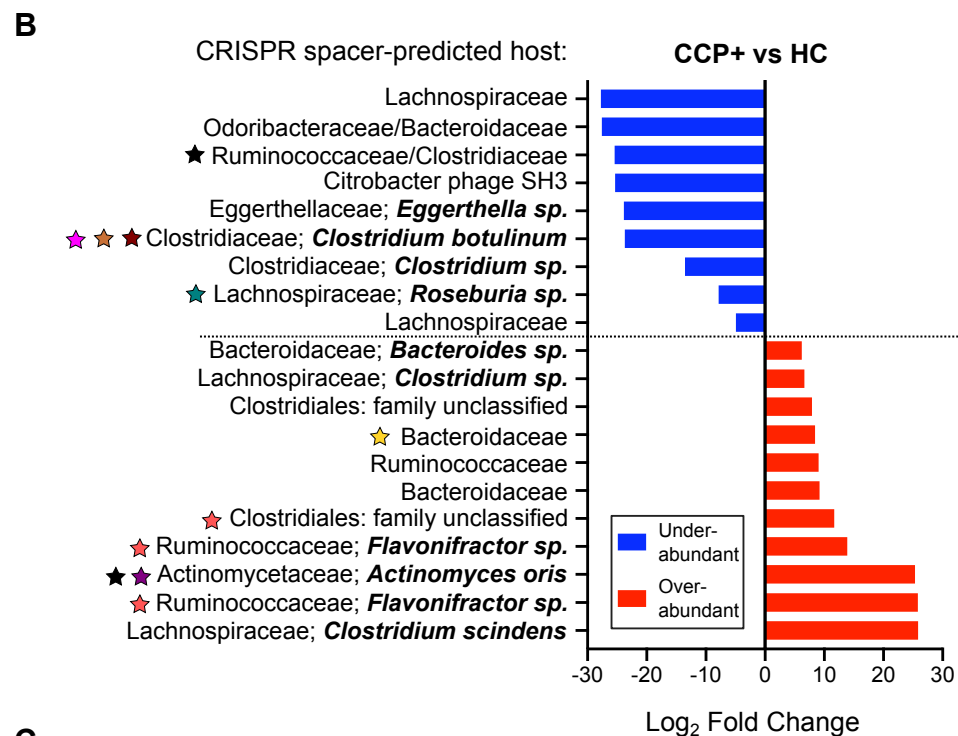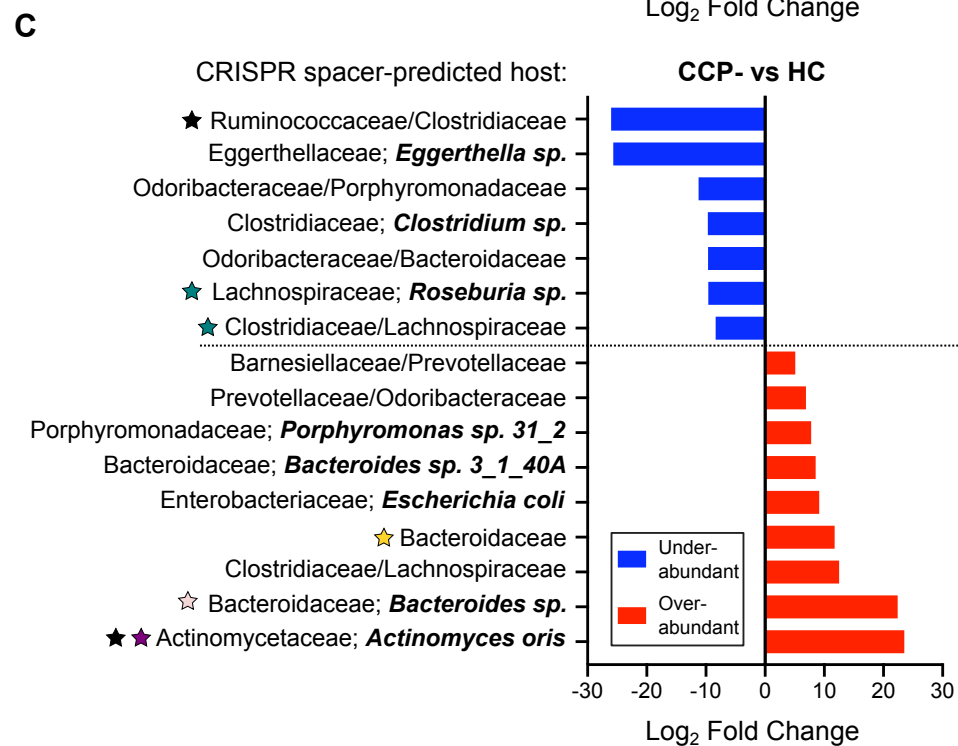

Source: https://www.biorxiv.org/content/10.1101/2021.02.03.429590v1.full.pdf
