# Supplementary material for: Individuals at risk for developing rheumatoid arthritis harbor differential intestinal bacteriophage communities with distinct metabolic potential
Source: bioRxiv or medRxiv preprint supplement (doi:10.1101/2021.02.03.429590), 2021-02-03

**Figure S5**

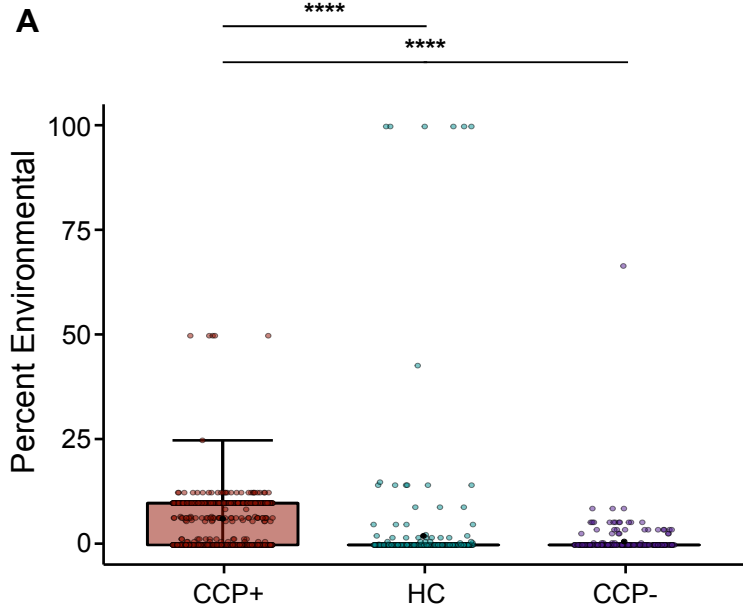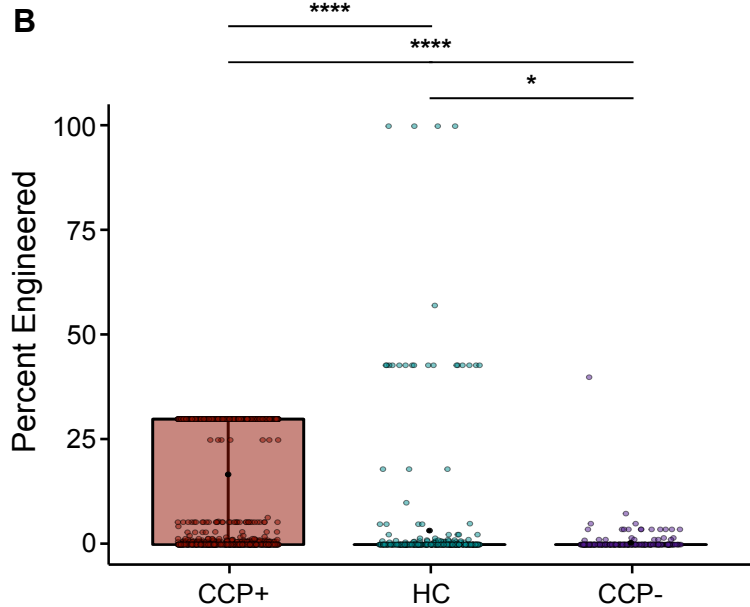

Supplement: Supplementary file [file media-5.pdf]
